# Supplementary material for: Nonclinical safety evaluation of pabinafusp alfa, an anti-human transferrin receptor antibody and iduronate-2-sulfatase fusion protein, for the treatment of neuronopathic mucopolysaccharidosis type II
Source: PubMed Central journal article supplement — Mol Genet Metab Rep. 2021 Apr 18;27:100758. doi: 10.1016/j.ymgmr.2021.100758 (PMC8081988; doi:10.1016/j.ymgmr.2021.100758), 2021-04-18
Supplement: mmc1.pdf [file mmc1.pdf]

**Table S1.** Anti-drug antibody production in cynomolgus monkeys in the 4-week repeat-dose toxicity study.

| Dose                               | 3 mg/kg |        | 10 mg/kg |        | 30 mg/kg |        |
|------------------------------------|---------|--------|----------|--------|----------|--------|
|                                    | Male    | Female | Male     | Female | Male     | Female |
| Male/Female                        |         |        |          |        |          |        |
| Number of animals (positive/total) |         |        |          |        |          |        |
| Anti-pabinafusp alfa antibody      | 3/3     | 3/3    | 3/3      | 2/3    | 4/5      | 3/5    |
| Nab (TfR)                          | 3/3     | 3/3    | 3/3      | 2/3    | 4/5      | 3/5    |
| Nab (M6PR)                         | 3/3     | 2/3    | 2/3      | 2/3    | 4/5      | 3/5    |

Anti-drug antibody analysis was performed on day 28 of dosing period.

Nab (TfR), TfR-binding inhibitory antibody; Nab (M6PR), M6PR-binding inhibitory antibody.

**Table S2.** Anti-drug antibody production in juvenile cynomolgus monkeys in the 4-week repeat-dose toxicity study.

| Dose                               | 3 mg/kg | 10 mg/kg | 30 mg/kg |
|------------------------------------|---------|----------|----------|
| Number of animals (positive/total) |         |          |          |
| Anti-pabinafusp alfa antibody      | 3/3     | 3/3      | 3/4      |
| Nab (TfR)                          | 3/3     | 3/3      | 3/4      |
| Nab (M6PR)                         | 3/3     | 2/3      | 2/4      |

Anti-drug antibody analysis was performed on day 28 of dosing period.

Nab (TfR), TfR-binding inhibitory antibody; Nab (M6PR), M6PR-binding inhibitory antibody.

**Table S3.** Anti-drug antibody production in cynomolgus monkeys in the 26-week repeat-dose toxicity study.

| Dose                               |                               | 3 mg/kg |        | 10 mg/kg |        | 30 mg/kg |        |
|------------------------------------|-------------------------------|---------|--------|----------|--------|----------|--------|
| Male/Female                        |                               | Male    | Female | Male     | Female | Male     | Female |
| Number of animals (positive/total) |                               |         |        |          |        |          |        |
| Day 84                             | Anti-pabinafusp alfa antibody | 4/4     | 3/4    | 4/4      | 4/4    | 6/6      | 4/6    |
|                                    | Nab (TfR)                     | 4/4     | 3/4    | 4/4      | 3/4    | 6/6      | 4/6    |
|                                    | Nab (M6PR)                    | 3/4     | 3/4    | 4/4      | 3/4    | 5/6      | 4/6    |
| Day 182                            | Anti-pabinafusp alfa antibody | 4/4     | 3/4    | 4/4      | 3/4    | 4/6      | 5/6    |
|                                    | Nab (TfR)                     | 4/4     | 3/4    | 4/4      | 2/4    | 4/6      | 5/6    |
|                                    | Nab (M6PR)                    | 3/4     | 3/4    | 4/4      | 2/4    | 4/6      | 5/6    |

Nab (TfR), TfR-binding inhibitory antibody; Nab (M6PR), M6PR-binding inhibitory antibody.

**Table S4.** Tissue radioactivity concentration in cynomolgus monkeys given a single intravenous dose of <sup>125</sup>I-labeled pabinafusp alfa.

| Organ/Tissue        | Radioactivity concentration (µg eq./mL or g) |       |        |        |        |        |       |        |        |           |
|---------------------|----------------------------------------------|-------|--------|--------|--------|--------|-------|--------|--------|-----------|
|                     | Male                                         |       |        |        |        | Female |       |        |        |           |
|                     | 2h                                           | 8h    | 24h    | 48h    | 72h    | 2h     | 8h    | 24h    | 48h    | 72h       |
| Blood               | 6.32                                         | 1.78  | 0.673  | 0.158  | 0.0587 | 6.37   | 2.54  | 1.14   | 0.433  | 0.216     |
| Brain               | 0.202                                        | 0.147 | 0.0521 | < 0.02 | < 0.02 | 0.278  | 0.182 | 0.108  | < 0.02 | < 0.02    |
| Spinal cord         | 0.377                                        | 0.253 | 0.0604 | 0.0256 | < 0.02 | 0.743  | 0.257 | 0.134  | 0.0553 | 0.0276    |
| Pituitary gland     | 0.526                                        | 0.445 | 0.0774 | 0.0362 | 0.0360 | 1.65   | 0.537 | 0.237  | 0.0726 | < 0.02    |
| Eyeball             | 0.0994                                       | 0.202 | 0.0528 | < 0.02 | < 0.02 | 0.0802 | 0.148 | 0.0986 | 0.0390 | < 0.02    |
| Submandibular gland | 0.496                                        | 0.514 | 0.158  | 0.0423 | < 0.02 | 0.827  | 0.834 | 0.247  | 0.130  | 0.0331    |
| Thyroid gland       | > 10                                         | > 10  | > 10   | > 10   | > 10   | > 10   | > 10  | > 10   | > 10   | > 10      |
| Thymus              | 1.17                                         | 1.23  | 0.206  | 0.0405 | 0.0606 | 1.13   | 0.691 | 1.27   | 0.345  | no sample |
| Heart               | 1.07                                         | 0.974 | 0.162  | 0.0467 | < 0.02 | 1.35   | 0.632 | 0.145  | 0.195  | 0.103     |
| Lung                | 4.96                                         | 2.25  | 0.648  | 0.102  | 0.0301 | 5.08   | 1.35  | 0.436  | 0.227  | 0.0978    |
| Liver               | 5.48                                         | 2.72  | 0.472  | 0.132  | 0.0479 | 6.76   | 2.16  | 1.08   | 0.339  | 0.309     |
| Kidney              | 2.82                                         | 1.47  | 0.886  | 0.0722 | 0.0236 | 3.04   | 1.86  | 0.808  | 0.145  | 0.167     |
| Adrenal gland       | 2.87                                         | 2.06  | 0.340  | 0.0962 | 0.0248 | 3.35   | 1.33  | 0.238  | 0.276  | 0.0681    |
| Spleen              | 4.81                                         | 2.01  | 1.92   | 0.214  | 0.0914 | 5.15   | 2.59  | 1.23   | 0.243  | 0.293     |
| Pancreas            | 0.874                                        | 1.27  | 0.612  | 0.0266 | < 0.02 | 1.22   | 0.540 | 0.384  | 0.0778 | 0.0690    |
| Epididymis          | 0.843                                        | 0.918 | 0.255  | 0.0706 | 0.0341 | -      | -     | -      | -      | -         |
| Testis              | 0.554                                        | 0.587 | 0.177  | 0.0435 | 0.0202 | -      | -     | -      | -      | -         |
| Uterus              | -                                            | -     | -      | -      | -      | 0.941  | 0.768 | 0.666  | 0.224  | 0.119     |
| Ovary               | -                                            | -     | -      | -      | -      | 0.608  | 0.637 | 0.296  | 0.0969 | 0.0637    |
| Skin                | 0.768                                        | 1.05  | 0.740  | 0.0399 | < 0.02 | 1.53   | 1.34  | 0.650  | 0.278  | 0.130     |
| Skeletal muscles    | 0.202                                        | 0.127 | 0.150  | < 0.02 | < 0.02 | 0.270  | 0.166 | 0.202  | 0.0236 | 0.0236    |
| Bone                | 0.543                                        | 0.707 | 0.156  | 0.0400 | 0.0229 | 0.862  | 0.593 | 0.650  | 0.145  | 0.0718    |
| Bone marrow         | 11.6                                         | 5.39  | 1.12   | 0.602  | 0.322  | 14.3   | 7.70  | 2.11   | 1.17   | 0.617     |

Data are from one animal for each time point.

**Table S5.** Hematological parameters of cynomolgus monkeys in the 4-week repeat-dose toxicity study.

| Male                         | Control        |                   |                   |                            | Pabinafusp alfa, 3 mg/kg |                   |                   | Pabinafusp alfa, 10 mg/kg |                   |                   | Pabinafusp alfa, 30 mg/kg |                   |                   |                            |
|------------------------------|----------------|-------------------|-------------------|----------------------------|--------------------------|-------------------|-------------------|---------------------------|-------------------|-------------------|---------------------------|-------------------|-------------------|----------------------------|
|                              | Pre<br>(n = 5) | Day 22<br>(n = 5) | Day 27<br>(n = 5) | End of recovery<br>(n = 2) | Pre<br>(n = 3)           | Day 22<br>(n = 3) | Day 27<br>(n = 3) | Pre<br>(n = 3)            | Day 22<br>(n = 3) | Day 27<br>(n = 3) | Pre<br>(n = 5)            | Day 22<br>(n = 5) | Day 27<br>(n = 5) | End of recovery<br>(n = 2) |
| RBC (10 <sup>6</sup> /μL)    | 5.622 ± 0.277  | 5.648 ± 0.272     | 5.684 ± 0.410     | 5.905                      | 4.973 ± 0.456*           | 4.903 ± 0.329*    | 5.040 ± 0.399     | 5.297 ± 0.230             | 5.570 ± 0.387     | 5.423 ± 0.131     | 5.546 ± 0.290             | 5.418 ± 0.334     | 5.382 ± 0.326     | 6.440                      |
| Hb (g/dL)                    | 14.04 ± 0.44   | 14.06 ± 0.96      | 14.08 ± 1.34      | 14.35                      | 13.43 ± 1.08             | 13.00 ± 0.87      | 13.23 ± 0.90      | 13.00 ± 0.40              | 13.33 ± 0.78      | 12.87 ± 0.21      | 13.46 ± 0.50              | 12.84 ± 0.56      | 12.48 ± 0.39      | 14.85                      |
| Ht (%)                       | 43.42 ± 1.43   | 44.20 ± 3.26      | 45.58 ± 3.86      | 44.90                      | 41.00 ± 2.34             | 40.83 ± 2.18      | 42.37 ± 3.15      | 39.97 ± 0.45*             | 42.50 ± 2.44      | 41.20 ± 1.91      | 41.58 ± 0.81              | 40.58 ± 1.80      | 40.26 ± 0.51*     | 47.40                      |
| MCV (fL)                     | 77.38 ± 4.34   | 78.22 ± 3.91      | 80.22 ± 4.58      | 76.05                      | 82.70 ± 3.10             | 83.37 ± 2.40      | 84.13 ± 2.98      | 75.53 ± 4.10              | 76.37 ± 3.12      | 76.07 ± 3.98      | 75.16 ± 4.76              | 75.08 ± 4.03      | 75.00 ± 3.90      | 73.70                      |
| MCH (pg)                     | 25.02 ± 1.10   | 24.94 ± 1.12      | 24.78 ± 1.22      | 24.30                      | 27.10 ± 0.40*            | 26.57 ± 0.12      | 26.30 ± 0.35      | 24.57 ± 0.40              | 23.93 ± 0.25      | 23.77 ± 0.21      | 24.30 ± 1.38              | 23.70 ± 1.09      | 23.22 ± 1.04      | 23.10                      |
| MCHC (g/dL)                  | 32.36 ± 0.53   | 31.86 ± 0.28      | 30.88 ± 0.83      | 31.95                      | 32.80 ± 0.75             | 31.87 ± 0.91      | 31.30 ± 0.95      | 32.57 ± 1.30              | 31.37 ± 1.18      | 31.33 ± 1.55      | 32.34 ± 1.04              | 31.62 ± 0.68      | 30.94 ± 0.61      | 31.35                      |
| Ret (%)                      | 1.04 ± 0.32    | 0.94 ± 0.32       | 1.48 ± 0.94       | 0.90                       | 0.73 ± 0.25              | 0.83 ± 0.15       | 1.13 ± 0.06       | 0.97 ± 0.23               | 0.93 ± 0.15       | 1.57 ± 0.50       | 0.84 ± 0.21               | 0.70 ± 0.19       | 1.24 ± 0.55       | 1.10                       |
| Plat (10 <sup>3</sup> /μL)   | 372.6 ± 98.3   | 434.4 ± 103.2     | 458.2 ± 117.6     | 513.5                      | 329.3 ± 134.5            | 335.3 ± 45.9      | 358.7 ± 76.1      | 377.7 ± 93.2              | 419.3 ± 100.3     | 433.3 ± 100.7     | 326.2 ± 52.4              | 348.4 ± 76.8      | 407.0 ± 57.6      | 396.0                      |
| WBC (10 <sup>3</sup> /μL)    | 9.212 ± 2.497  | 10.486 ± 2.548    | 10.400 ± 1.119    | 9.410                      | 8.667 ± 1.340            | 6.107 ± 1.471*    | 8.457 ± 1.206     | 11.270 ± 0.505            | 9.963 ± 1.277     | 13.930 ± 1.421    | 9.738 ± 1.649             | 7.112 ± 2.464     | 11.926 ± 4.014    | 10.140                     |
| Neutro (10 <sup>3</sup> /μL) | 4.082 ± 1.412  | 5.052 ± 0.968     | 4.758 ± 1.082     | 4.405                      | 5.463 ± 1.064            | 3.527 ± 1.124     | 5.113 ± 0.634     | 3.650 ± 0.145             | 3.697 ± 1.291     | 4.500 ± 2.084     | 4.480 ± 1.376             | 3.398 ± 1.905     | 5.570 ± 3.327     | 4.440                      |
| Lymph (10 <sup>3</sup> /μL)  | 4.562 ± 1.889  | 4.854 ± 1.555     | 5.084 ± 1.375     | 4.530                      | 2.720 ± 0.426            | 2.270 ± 0.331     | 2.957 ± 0.563     | 7.003 ± 0.500             | 5.750 ± 0.092     | 8.733 ± 1.353**   | 4.634 ± 1.435             | 3.324 ± 1.328     | 5.756 ± 1.691     | 4.955                      |
| Mono (10 <sup>3</sup> /μL)   | 0.352 ± 0.085  | 0.330 ± 0.087     | 0.308 ± 0.063     | 0.295                      | 0.350 ± 0.104            | 0.177 ± 0.023*    | 0.283 ± 0.021     | 0.430 ± 0.082             | 0.200 ± 0.026     | 0.360 ± 0.036     | 0.426 ± 0.200             | 0.134 ± 0.086**   | 0.298 ± 0.129     | 0.430                      |
| Eosino (10 <sup>3</sup> /μL) | 0.146 ± 0.086  | 0.166 ± 0.146     | 0.144 ± 0.116     | 0.110                      | 0.090 ± 0.010            | 0.090 ± 0.056     | 0.057 ± 0.035     | 0.110 ± 0.035             | 0.150 ± 0.046     | 0.183 ± 0.058     | 0.124 ± 0.042             | 0.164 ± 0.192     | 0.166 ± 0.096     | 0.210                      |
| Baso (10 <sup>3</sup> /μL)   | 0.028 ± 0.011  | 0.024 ± 0.005     | 0.038 ± 0.016     | 0.030                      | 0.023 ± 0.012            | 0.013 ± 0.006     | 0.020 ± 0.000     | 0.030 ± 0.010             | 0.030 ± 0.010     | 0.047 ± 0.015     | 0.034 ± 0.015             | 0.018 ± 0.008     | 0.046 ± 0.023     | 0.035                      |
| LUC (10 <sup>3</sup> /μL)    | 0.042 ± 0.023  | 0.052 ± 0.019     | 0.064 ± 0.017     | 0.040                      | 0.027 ± 0.015            | 0.040 ± 0.030     | 0.027 ± 0.025     | 0.043 ± 0.023             | 0.130 ± 0.030**   | 0.103 ± 0.006     | 0.044 ± 0.018             | 0.076 ± 0.030     | 0.092 ± 0.071     | 0.065                      |

  

| Female                       | Control        |                   |                   |                            | Pabinafusp alfa, 3 mg/kg |                   |                   | Pabinafusp alfa, 10 mg/kg |                   |                   | Pabinafusp alfa, 30 mg/kg |                   |                   |                            |
|------------------------------|----------------|-------------------|-------------------|----------------------------|--------------------------|-------------------|-------------------|---------------------------|-------------------|-------------------|---------------------------|-------------------|-------------------|----------------------------|
|                              | Pre<br>(n = 5) | Day 22<br>(n = 5) | Day 27<br>(n = 5) | End of recovery<br>(n = 2) | Pre<br>(n = 3)           | Day 22<br>(n = 3) | Day 27<br>(n = 3) | Pre<br>(n = 3)            | Day 22<br>(n = 3) | Day 27<br>(n = 3) | Pre<br>(n = 5)            | Day 22<br>(n = 5) | Day 27<br>(n = 5) | End of recovery<br>(n = 2) |
| RBC (10 <sup>6</sup> /μL)    | 5.236 ± 0.398  | 5.362 ± 0.293     | 5.406 ± 0.225     | 5.925                      | 5.190 ± 0.121            | 5.123 ± 0.214     | 5.187 ± 0.164     | 5.330 ± 0.078             | 5.260 ± 0.191     | 5.353 ± 0.225     | 5.328 ± 0.184             | 5.164 ± 0.219     | 5.182 ± 0.174     | 5.680                      |
| Hb (g/dL)                    | 12.64 ± 1.01   | 12.88 ± 0.82      | 13.02 ± 0.65      | 14.05                      | 12.63 ± 0.40             | 12.30 ± 0.44      | 12.40 ± 0.36      | 13.10 ± 0.60              | 12.63 ± 0.78      | 12.87 ± 0.55      | 12.82 ± 0.46              | 12.02 ± 0.78      | 12.20 ± 0.76      | 13.50                      |
| Ht (%)                       | 39.56 ± 2.56   | 42.68 ± 1.56      | 42.20 ± 0.87      | 45.10                      | 38.87 ± 0.67             | 40.73 ± 1.53      | 40.27 ± 1.63      | 41.40 ± 0.66              | 41.77 ± 0.90      | 41.67 ± 0.85      | 40.52 ± 1.48              | 40.38 ± 2.74      | 39.48 ± 2.01*     | 43.65                      |
| MCV (fL)                     | 75.60 ± 2.11   | 79.64 ± 3.01      | 78.10 ± 2.33      | 76.20                      | 74.87 ± 0.55             | 79.47 ± 0.51      | 77.57 ± 0.83      | 77.63 ± 2.36              | 79.50 ± 2.72      | 77.97 ± 2.61      | 76.08 ± 2.66              | 78.10 ± 2.50      | 76.20 ± 2.32      | 76.85                      |
| MCH (pg)                     | 24.14 ± 0.40   | 24.02 ± 0.52      | 24.12 ± 0.62      | 23.70                      | 24.30 ± 0.26             | 23.97 ± 0.15      | 23.90 ± 0.10      | 24.67 ± 1.52              | 24.03 ± 1.53      | 24.03 ± 1.46      | 24.04 ± 0.69              | 23.34 ± 0.70      | 23.54 ± 0.72      | 23.75                      |
| MCHC (g/dL)                  | 31.94 ± 0.95   | 30.16 ± 1.18      | 30.86 ± 1.25      | 31.10                      | 32.47 ± 0.47             | 30.17 ± 0.06      | 30.80 ± 0.46      | 31.70 ± 1.00              | 30.20 ± 1.14      | 30.83 ± 0.91      | 31.58 ± 0.46              | 29.86 ± 0.42      | 30.88 ± 0.66      | 30.95                      |
| Ret (%)                      | 1.08 ± 0.65    | 1.46 ± 0.37       | 1.52 ± 0.58       | 0.95                       | 0.80 ± 0.61              | 0.97 ± 0.06       | 1.57 ± 0.72       | 0.87 ± 0.47               | 1.10 ± 0.20       | 1.73 ± 0.23       | 0.78 ± 0.24               | 1.20 ± 0.20       | 2.26 ± 0.23       | 1.10                       |
| Plat (10 <sup>3</sup> /μL)   | 442.2 ± 85.2   | 515.4 ± 111.1     | 510.0 ± 108.9     | 451.0                      | 410.3 ± 33.8             | 458.7 ± 10.2      | 485.3 ± 51.6      | 360.7 ± 86.0              | 440.3 ± 147.1     | 433.7 ± 122.0     | 393.8 ± 54.8              | 508.0 ± 75.1      | 535.0 ± 68.5      | 454.0                      |
| WBC (10 <sup>3</sup> /μL)    | 8.298 ± 2.002  | 9.940 ± 0.793     | 8.756 ± 1.616     | 5.740                      | 12.430 ± 0.984*          | 11.623 ± 1.106    | 11.383 ± 0.427    | 7.727 ± 1.631             | 7.173 ± 2.757     | 7.960 ± 3.140     | 10.934 ± 2.253            | 8.018 ± 1.783     | 12.426 ± 4.178    | 12.030                     |
| Neutro (10 <sup>3</sup> /μL) | 4.120 ± 1.790  | 4.176 ± 0.897     | 4.480 ± 1.274     | 2.775                      | 5.340 ± 2.521            | 4.900 ± 1.698     | 4.640 ± 0.789     | 4.053 ± 0.643             | 3.393 ± 1.094     | 3.813 ± 0.826     | 5.450 ± 2.286             | 3.890 ± 1.440     | 5.406 ± 2.990     | 7.570                      |
| Lymph (10 <sup>3</sup> /μL)  | 3.692 ± 0.534  | 5.108 ± 0.568     | 3.792 ± 0.548     | 2.690                      | 6.583 ± 1.694*           | 6.163 ± 1.001     | 6.237 ± 0.969     | 3.293 ± 1.431             | 3.263 ± 1.526     | 3.700 ± 2.104     | 4.848 ± 1.174             | 3.696 ± 0.994     | 6.152 ± 1.949     | 4.015                      |
| Mono (10 <sup>3</sup> /μL)   | 0.306 ± 0.080  | 0.352 ± 0.090     | 0.272 ± 0.038     | 0.160                      | 0.337 ± 0.117            | 0.247 ± 0.103     | 0.257 ± 0.091     | 0.220 ± 0.046             | 0.267 ± 0.135     | 0.243 ± 0.101     | 0.362 ± 0.109             | 0.142 ± 0.060*    | 0.322 ± 0.125     | 0.270                      |
| Eosino (10 <sup>3</sup> /μL) | 0.128 ± 0.069  | 0.236 ± 0.109     | 0.152 ± 0.078     | 0.095                      | 0.073 ± 0.015            | 0.197 ± 0.081     | 0.163 ± 0.057     | 0.100 ± 0.089             | 0.167 ± 0.134     | 0.137 ± 0.127     | 0.204 ± 0.169             | 0.196 ± 0.152     | 0.420 ± 0.581     | 0.110                      |
| Baso (10 <sup>3</sup> /μL)   | 0.020 ± 0.007  | 0.034 ± 0.011     | 0.030 ± 0.007     | 0.015                      | 0.037 ± 0.006*           | 0.033 ± 0.012     | 0.037 ± 0.012     | 0.023 ± 0.006             | 0.027 ± 0.012     | 0.033 ± 0.023     | 0.032 ± 0.008             | 0.024 ± 0.015     | 0.046 ± 0.025     | 0.045                      |
| LUC (10 <sup>3</sup> /μL)    | 0.028 ± 0.013  | 0.038 ± 0.008     | 0.024 ± 0.009     | 0.015                      | 0.057 ± 0.015            | 0.087 ± 0.012*    | 0.050 ± 0.000     | 0.037 ± 0.015             | 0.053 ± 0.032     | 0.043 ± 0.015     | 0.038 ± 0.022             | 0.066 ± 0.025     | 0.076 ± 0.043*    | 0.025                      |

End of recovery = 27 days after the final dosing.

Data are means ± S.D. \**P* < 0.05, \*\**P* < 0.01 vs. control.

RBC, red blood cells; Hb, hemoglobin; Ht, hematocrit; MCV, mean corpuscular volume; MCH, mean corpuscular hemoglobin; MCHC, mean corpuscular hemoglobin concentration; Ret, reticulocytes; Plat, platelets; WBC, white blood cells; Neutro, neutrophils; Lymph, lymphocytes; Mono, monocytes; Eosino, eosinophils; Baso, basophils; LUC, large unstained cells.

**Table S6.** Blood chemistry of cynomolgus monkeys in the 4-week repeat-dose toxicity study.

| Male            | Control         |                   |                            | Pabinafusp alfa, 3 mg/kg |                   | Pabinafusp alfa, 10 mg/kg |                   | Pabinafusp alfa, 30 mg/kg |                   |                            |
|-----------------|-----------------|-------------------|----------------------------|--------------------------|-------------------|---------------------------|-------------------|---------------------------|-------------------|----------------------------|
|                 | Pre<br>(n = 5)  | Day 27<br>(n = 5) | End of recovery<br>(n = 2) | Pre<br>(n = 3)           | Day 27<br>(n = 3) | Pre<br>(n = 3)            | Day 27<br>(n = 3) | Pre<br>(n = 5)            | Day 27<br>(n = 5) | End of recovery<br>(n = 2) |
| AST (IU/L)      | 57.2 ± 25.1     | 45.6 ± 38.1       | 28.5                       | 44.7 ± 8.1               | 54.7 ± 52.7       | 46.7 ± 17.2               | 26.0 ± 10.0       | 55.6 ± 39.8               | 26.4 ± 5.9        | 25.0                       |
| ALT (IU/L)      | 50.6 ± 14.4     | 141.2 ± 235.3     | 35.5                       | 42.7 ± 10.4              | 117.3 ± 156.5     | 40.3 ± 18.9               | 24.3 ± 7.2*       | 61.6 ± 16.2               | 37.6 ± 5.8        | 32.5                       |
| ALP (IU/L)      | 703.4 ± 421.4   | 648.6 ± 304.9     | 586.5                      | 600.7 ± 572.9            | 488.3 ± 272.6     | 924.3 ± 570.2             | 857.7 ± 562.0     | 746.2 ± 504.4             | 678.0 ± 343.6     | 386.0                      |
| CK (IU/L)       | 1054.6 ± 1587.7 | 211.2 ± 127.5     | 129.0                      | 657.7 ± 584.0            | 303.7 ± 143.5     | 1128.0 ± 1596.2           | 158.0 ± 57.9      | 415.6 ± 338.7             | 212.4 ± 121.5     | 150.5                      |
| T-Bil (mg/dL)   | 0.218 ± 0.093   | 0.090 ± 0.021     | 0.125                      | 0.113 ± 0.023            | 0.097 ± 0.012     | 0.123 ± 0.040             | 0.120 ± 0.053     | 0.138 ± 0.043             | 0.134 ± 0.043     | 0.105                      |
| TP (g/dL)       | 7.50 ± 0.25     | 7.62 ± 0.24       | 7.65                       | 7.47 ± 0.40              | 7.77 ± 0.40       | 7.33 ± 0.06               | 7.73 ± 0.15       | 7.28 ± 0.52               | 7.80 ± 0.66       | 8.00                       |
| Albumin (g/dL)  | 4.08 ± 0.28     | 4.10 ± 0.29       | 4.30                       | 4.20 ± 0.20              | 4.10 ± 0.10       | 4.17 ± 0.06               | 4.20 ± 0.17       | 3.98 ± 0.13               | 3.86 ± 0.09       | 4.20                       |
| Globulin (g/dL) | 3.42 ± 0.26     | 3.52 ± 0.25       | 3.35                       | 3.27 ± 0.21              | 3.67 ± 0.45       | 3.17 ± 0.12               | 3.53 ± 0.06       | 3.30 ± 0.42               | 3.94 ± 0.64       | 3.80                       |
| A/G (ratio)     | 1.202 ± 0.154   | 1.172 ± 0.150     | 1.285                      | 1.287 ± 0.025            | 1.130 ± 0.161     | 1.313 ± 0.064             | 1.190 ± 0.062     | 1.220 ± 0.145             | 1.002 ± 0.172     | 1.105                      |
| TG (mg/dL)      | 28.4 ± 14.7     | 33.0 ± 9.5        | 40.0                       | 33.7 ± 17.1              | 33.0 ± 15.9       | 59.7 ± 34.2               | 42.0 ± 7.0        | 31.2 ± 12.2               | 34.8 ± 15.2       | 48.5                       |
| T-cho (mg/dL)   | 114.8 ± 22.9    | 121.2 ± 23.7      | 109.0                      | 117.3 ± 7.5              | 129.0 ± 24.6      | 106.3 ± 26.4              | 111.7 ± 20.8      | 109.6 ± 28.0              | 118.0 ± 23.8      | 100.5                      |
| Glucose (mg/dL) | 72.0 ± 13.6     | 75.4 ± 11.1       | 79.0                       | 72.0 ± 19.1              | 73.7 ± 6.0        | 71.0 ± 11.3               | 84.3 ± 9.1        | 77.0 ± 8.6                | 74.8 ± 6.7        | 71.0                       |
| UN (mg/dL)      | 24.58 ± 6.49    | 21.66 ± 5.16      | 19.70                      | 21.23 ± 3.87             | 21.47 ± 3.76      | 27.33 ± 3.42              | 24.27 ± 2.87      | 21.96 ± 3.19              | 22.04 ± 3.91      | 20.50                      |
| Cre (mg/dL)     | 0.910 ± 0.146   | 0.884 ± 0.189     | 0.865                      | 0.890 ± 0.174            | 0.943 ± 0.219     | 0.923 ± 0.114             | 0.970 ± 0.141     | 0.952 ± 0.227             | 0.984 ± 0.216     | 1.225                      |
| IP (mg/dL)      | 5.474 ± 0.819   | 4.626 ± 0.700     | 4.515                      | 4.267 ± 0.879            | 4.643 ± 1.391     | 4.830 ± 1.000             | 4.983 ± 0.676     | 4.696 ± 0.443             | 4.132 ± 0.551     | 3.715                      |
| Ca (mg/dL)      | 9.98 ± 0.54     | 10.24 ± 0.50      | 9.95                       | 9.83 ± 0.40              | 9.83 ± 0.21       | 9.77 ± 0.47               | 9.97 ± 0.25       | 9.56 ± 0.21               | 9.64 ± 0.31       | 10.35                      |
| Na (mEq/L)      | 146.6 ± 5.0     | 150.0 ± 1.6       | 145.5                      | 147.7 ± 3.1              | 149.3 ± 2.9       | 147.0 ± 3.0               | 148.3 ± 4.2       | 147.6 ± 2.4               | 147.4 ± 2.2       | 150.0                      |
| K (mEq/L)       | 4.82 ± 0.77     | 4.92 ± 0.37       | 4.15                       | 4.70 ± 0.46              | 4.63 ± 0.35       | 5.07 ± 0.15               | 4.63 ± 0.38       | 4.36 ± 0.38               | 4.22 ± 0.41*      | 4.80                       |
| Cl (mEq/L)      | 104.8 ± 8.5     | 109.4 ± 3.9       | 107.5                      | 108.3 ± 1.2              | 109.0 ± 1.0       | 109.3 ± 1.2               | 110.3 ± 2.9       | 108.4 ± 2.6               | 109.0 ± 2.5       | 109.5                      |
| Fe (µg/dL)      | 147.34 ± 31.75  | 156.58 ± 22.73    | 183.00                     | 156.93 ± 11.40           | 154.00 ± 22.00    | 168.57 ± 17.69            | 147.87 ± 5.41     | 142.14 ± 43.49            | 124.10 ± 37.61    | 141.75                     |
| UIBC (µg/dL)    | 232.12 ± 42.97  | 241.02 ± 41.37    | 174.90                     | 207.63 ± 78.85           | 236.23 ± 51.76    | 205.10 ± 14.08            | 247.83 ± 35.11    | 224.24 ± 26.46            | 259.50 ± 16.84    | 220.00                     |
| FER (ng/mL)     | 12.36 ± 7.67    | 20.48 ± 21.62     | 9.20                       | 5.23 ± 4.60              | 29.80 ± 13.74     | 13.87 ± 4.06              | 11.47 ± 3.27      | 9.42 ± 3.80               | 11.46 ± 1.88      | 3.25                       |
| Hp (mg/dL)      | 72.62 ± 22.08   | 88.40 ± 30.98     | 47.70                      | 59.90 ± 41.24            | 53.80 ± 17.72     | 63.83 ± 29.91             | 46.00 ± 28.24     | 75.40 ± 38.24             | 68.44 ± 42.11     | 56.00                      |
| TIBC (µg/dL)    | 379.46 ± 30.61  | 397.60 ± 24.67    | 357.90                     | 364.57 ± 86.61           | 390.23 ± 73.05    | 373.67 ± 29.27            | 395.70 ± 31.00    | 366.38 ± 29.40            | 383.60 ± 25.08    | 361.75                     |

  

| Female          | Control         |                   |                            | Pabinafusp alfa, 3 mg/kg |                   | Pabinafusp alfa, 10 mg/kg |                   | Pabinafusp alfa, 30 mg/kg |                   |                            |
|-----------------|-----------------|-------------------|----------------------------|--------------------------|-------------------|---------------------------|-------------------|---------------------------|-------------------|----------------------------|
|                 | Pre<br>(n = 5)  | Day 27<br>(n = 5) | End of recovery<br>(n = 2) | Pre<br>(n = 3)           | Day 27<br>(n = 3) | Pre<br>(n = 3)            | Day 27<br>(n = 3) | Pre<br>(n = 5)            | Day 27<br>(n = 5) | End of recovery<br>(n = 2) |
| AST (IU/L)      | 50.2 ± 14.6     | 32.4 ± 6.4        | 42.0                       | 34.0 ± 8.2               | 24.7 ± 2.1        | 36.7 ± 8.1                | 29.7 ± 12.9       | 48.2 ± 20.4               | 33.4 ± 10.5       | 34.5                       |
| ALT (IU/L)      | 72.8 ± 38.7     | 70.8 ± 53.3       | 60.5                       | 64.7 ± 14.6              | 54.3 ± 14.3       | 51.7 ± 18.6               | 42.3 ± 7.6        | 58.0 ± 13.3               | 46.4 ± 19.7       | 43.5                       |
| ALP (IU/L)      | 435.0 ± 161.6   | 481.8 ± 137.3     | 427.0                      | 566.7 ± 409.0            | 580.3 ± 416.3     | 490.3 ± 205.1             | 537.0 ± 204.5     | 489.6 ± 165.7             | 494.2 ± 130.1     | 344.5                      |
| CK (IU/L)       | 1150.2 ± 1409.8 | 173.0 ± 60.4      | 515.5                      | 378.3 ± 390.8            | 275.3 ± 85.6      | 222.0 ± 55.7              | 211.7 ± 92.5      | 560.4 ± 448.3             | 243.6 ± 263.0     | 92.5                       |
| T-Bil (mg/dL)   | 0.214 ± 0.036   | 0.124 ± 0.027     | 0.180                      | 0.180 ± 0.098            | 0.150 ± 0.061     | 0.173 ± 0.045             | 0.110 ± 0.010     | 0.192 ± 0.046             | 0.132 ± 0.032     | 0.105                      |
| TP (g/dL)       | 7.38 ± 0.33     | 7.36 ± 0.23       | 7.25                       | 7.07 ± 0.25              | 7.27 ± 0.32       | 7.53 ± 0.50               | 7.37 ± 0.64       | 7.18 ± 0.42               | 7.34 ± 0.29       | 7.15                       |
| Albumin (g/dL)  | 3.96 ± 0.15     | 3.92 ± 0.11       | 3.95                       | 3.87 ± 0.15              | 3.90 ± 0.17       | 3.97 ± 0.25               | 3.80 ± 0.36       | 3.96 ± 0.22               | 3.90 ± 0.19       | 4.10                       |
| Globulin (g/dL) | 3.42 ± 0.22     | 3.44 ± 0.17       | 3.30                       | 3.20 ± 0.40              | 3.37 ± 0.42       | 3.57 ± 0.25               | 3.57 ± 0.29       | 3.22 ± 0.34               | 3.44 ± 0.29       | 3.05                       |
| A/G (ratio)     | 1.160 ± 0.057   | 1.140 ± 0.052     | 1.200                      | 1.227 ± 0.200            | 1.173 ± 0.192     | 1.113 ± 0.006             | 1.067 ± 0.032     | 1.242 ± 0.133             | 1.142 ± 0.120     | 1.345                      |
| TG (mg/dL)      | 37.4 ± 17.9     | 50.4 ± 23.1       | 58.0                       | 40.7 ± 18.2              | 38.7 ± 14.6       | 29.0 ± 7.8                | 31.0 ± 6.6        | 40.4 ± 12.7               | 50.2 ± 19.0       | 35.0                       |
| T-cho (mg/dL)   | 124.0 ± 20.8    | 130.8 ± 8.0       | 123.5                      | 128.0 ± 30.0             | 133.3 ± 23.5      | 137.3 ± 7.0               | 141.0 ± 13.5      | 123.0 ± 45.7              | 122.4 ± 29.0      | 103.0                      |
| Glucose (mg/dL) | 69.8 ± 2.8      | 76.0 ± 12.0       | 63.0                       | 77.3 ± 9.5               | 67.7 ± 1.5        | 69.7 ± 3.2                | 72.0 ± 3.6        | 72.2 ± 9.5                | 77.0 ± 7.8        | 85.0                       |
| UN (mg/dL)      | 19.62 ± 4.24    | 20.08 ± 3.83      | 23.10                      | 25.87 ± 4.57             | 23.10 ± 4.44      | 17.83 ± 2.39              | 19.10 ± 4.10      | 24.00 ± 3.84              | 23.86 ± 2.89      | 24.40                      |
| Cre (mg/dL)     | 0.670 ± 0.091   | 0.658 ± 0.104     | 0.690                      | 0.720 ± 0.066            | 0.740 ± 0.072     | 0.743 ± 0.153             | 0.697 ± 0.134     | 0.724 ± 0.098             | 0.686 ± 0.089     | 0.775                      |
| IP (mg/dL)      | 4.498 ± 0.898   | 4.424 ± 0.804     | 3.660                      | 4.187 ± 0.700            | 4.060 ± 0.536     | 4.313 ± 0.415             | 3.883 ± 0.716     | 4.480 ± 0.891             | 4.282 ± 0.434     | 2.810                      |
| Ca (mg/dL)      | 9.74 ± 0.44     | 9.82 ± 0.28       | 9.80                       | 9.83 ± 0.12              | 9.63 ± 0.35       | 9.83 ± 0.49               | 9.57 ± 0.64       | 9.86 ± 0.36               | 9.70 ± 0.21       | 9.70                       |
| Na (mEq/L)      | 146.0 ± 3.3     | 148.0 ± 2.6       | 146.0                      | 144.7 ± 0.6              | 145.3 ± 1.2       | 146.7 ± 1.5               | 147.3 ± 3.5       | 146.2 ± 1.9               | 144.6 ± 1.1       | 146.0                      |
| K (mEq/L)       | 4.56 ± 0.21     | 4.84 ± 0.45       | 4.55                       | 4.60 ± 0.36              | 4.40 ± 0.10       | 5.00 ± 0.53               | 4.73 ± 0.92       | 4.74 ± 0.21               | 4.58 ± 0.30       | 3.95                       |
| Cl (mEq/L)      | 107.6 ± 1.5     | 109.6 ± 2.5       | 111.5                      | 108.0 ± 1.0              | 108.3 ± 2.9       | 108.0 ± 1.0               | 108.7 ± 2.1       | 108.0 ± 1.9               | 107.2 ± 1.6       | 108.5                      |
| Fe (µg/dL)      | 158.76 ± 17.95  | 167.68 ± 23.18    | 173.05                     | 141.60 ± 15.80           | 130.87 ± 10.03    | 155.57 ± 43.71            | 157.43 ± 21.26    | 159.72 ± 27.36            | 129.90 ± 36.16    | 166.20                     |
| UIBC (µg/dL)    | 200.84 ± 58.62  | 211.84 ± 40.30    | 201.95                     | 203.03 ± 51.74           | 248.67 ± 41.65    | 186.27 ± 5.22             | 195.83 ± 39.22    | 201.40 ± 24.43            | 250.82 ± 27.32    | 219.55                     |
| FER (ng/mL)     | 7.30 ± 4.71     | 12.92 ± 17.22     | 15.55                      | 2.83 ± 1.01              | 5.23 ± 3.73       | 2.77 ± 2.70               | 5.77 ± 2.16       | 6.66 ± 8.49               | 14.16 ± 12.87     | 8.70                       |
| Hp (mg/dL)      | 49.94 ± 22.94   | 33.62 ± 19.43     | 30.85                      | 44.57 ± 13.27            | 22.37 ± 19.80     | 63.07 ± 26.16             | 31.00 ± 11.88     | 70.40 ± 28.85             | 56.58 ± 25.56     | 85.70                      |
| TIBC (µg/dL)    | 359.60 ± 55.11  | 379.52 ± 43.59    | 375.00                     | 344.63 ± 36.25           | 379.53 ± 47.97    | 341.83 ± 46.23            | 353.27 ± 60.38    | 361.12 ± 26.84            | 380.72 ± 38.20    | 385.75                     |

End of recovery = 27 days after the final dosing.

Data are means ± S.D. \*P < 0.05 vs. control.

AST, aspartate transaminase; ALT, alanine transaminase; ALP, alkaline phosphatase; CK, creatine kinase; T-Bil, total bilirubin; TP, total protein; A/G, albumin/globulin ratio; TG, triglyceride; T-cho, total cholesterol; UN, urea nitrogen; Cre, creatinine; IP, inorganic phosphorus; UIBC, unsaturated iron binding capacity; FER, ferritin; Hp, haptoglobin; TIBC, total iron binding capacity.

**Table S7.** Hematological parameters of juvenile cynomolgus monkeys in the 4-week repeat-dose toxicity study.

|        |                       | Control        |                   |                            | Pabinafusp alfa, 3 mg/kg |                   | Pabinafusp alfa, 10 mg/kg |                   | Pabinafusp alfa, 30 mg/kg |                   |                            |
|--------|-----------------------|----------------|-------------------|----------------------------|--------------------------|-------------------|---------------------------|-------------------|---------------------------|-------------------|----------------------------|
|        |                       | Pre<br>(n = 5) | Day 27<br>(n = 5) | End of recovery<br>(n = 2) | Pre<br>(n = 3)           | Day 27<br>(n = 3) | Pre<br>(n = 3)            | Day 27<br>(n = 3) | Pre<br>(n = 5)            | Day 27<br>(n = 5) | End of recovery<br>(n = 2) |
| RBC    | (10 <sup>6</sup> /μL) | 6.172 ± 0.274  | 6.276 ± 0.275     | 5.945                      | 6.063 ± 0.180            | 6.050 ± 0.108     | 5.960 ± 0.229             | 5.893 ± 0.305     | 6.292 ± 0.695             | 5.912 ± 0.619     | 6.065                      |
| Hb     | (g/dL)                | 13.70 ± 0.25   | 14.24 ± 0.26      | 14.10                      | 13.73 ± 0.65             | 13.77 ± 0.70      | 13.40 ± 1.21              | 13.27 ± 0.90      | 13.88 ± 0.49              | 12.80 ± 1.08*     | 13.90                      |
| Ht     | (%)                   | 46.90 ± 1.15   | 48.52 ± 2.13      | 47.95                      | 48.23 ± 2.38             | 47.93 ± 3.17      | 47.10 ± 2.50              | 46.17 ± 2.54      | 49.40 ± 2.59              | 46.62 ± 4.40      | 47.90                      |
| MCV    | (fL)                  | 76.08 ± 3.90   | 77.48 ± 5.32      | 80.75                      | 79.53 ± 2.12             | 79.17 ± 3.86      | 79.07 ± 2.77              | 78.40 ± 2.01      | 78.90 ± 4.96              | 79.12 ± 5.61      | 79.05                      |
| MCH    | (pg)                  | 22.28 ± 1.35   | 22.72 ± 1.27      | 23.75                      | 22.70 ± 0.61             | 22.80 ± 0.80      | 22.47 ± 1.17              | 22.57 ± 0.84      | 22.20 ± 1.71              | 21.74 ± 1.52      | 22.95                      |
| MCHC   | (g/dL)                | 29.26 ± 0.93   | 29.38 ± 0.79      | 29.45                      | 28.53 ± 0.15             | 28.80 ± 0.36      | 28.47 ± 1.45              | 28.80 ± 0.40      | 28.14 ± 0.69              | 27.52 ± 0.49**    | 29.00                      |
| Ret    | (%)                   | 1.34 ± 0.56    | 1.14 ± 0.42       | 0.95                       | 1.37 ± 0.25              | 1.13 ± 0.31       | 1.37 ± 0.51               | 1.60 ± 0.26       | 1.60 ± 0.30               | 2.76 ± 0.36**     | 0.65                       |
| Plat   | (10 <sup>3</sup> /μL) | 537.0 ± 124.9  | 513.4 ± 127.6     | 408.0                      | 498.0 ± 95.5             | 525.0 ± 22.1      | 456.3 ± 20.3              | 507.3 ± 66.5      | 431.2 ± 86.7              | 572.8 ± 214.2     | 307.5                      |
| WBC    | (10 <sup>3</sup> /μL) | 13.006 ± 4.479 | 12.978 ± 3.882    | 16.410                     | 15.653 ± 3.599           | 12.387 ± 1.887    | 14.460 ± 2.045            | 15.827 ± 2.257    | 16.682 ± 3.683            | 15.484 ± 2.146    | 15.485                     |
| Neutro | (10 <sup>3</sup> /μL) | 2.978 ± 1.463  | 2.574 ± 0.796     | 7.175                      | 2.860 ± 0.444            | 2.127 ± 0.514     | 2.090 ± 0.588             | 2.230 ± 0.763     | 3.080 ± 0.507             | 2.552 ± 0.627     | 2.135                      |
| Lymph  | (10 <sup>3</sup> /μL) | 9.150 ± 2.814  | 9.558 ± 2.864     | 8.480                      | 11.467 ± 2.892           | 9.353 ± 1.339     | 11.413 ± 1.367            | 12.657 ± 3.002    | 12.318 ± 3.548            | 11.976 ± 2.163    | 12.395                     |
| Mono   | (10 <sup>3</sup> /μL) | 0.568 ± 0.258  | 0.586 ± 0.247     | 0.515                      | 0.960 ± 0.214            | 0.663 ± 0.170     | 0.520 ± 0.202             | 0.557 ± 0.091     | 0.784 ± 0.216             | 0.580 ± 0.145     | 0.565                      |
| Eosino | (10 <sup>3</sup> /μL) | 0.166 ± 0.081  | 0.122 ± 0.036     | 0.115                      | 0.157 ± 0.035            | 0.103 ± 0.061     | 0.283 ± 0.295             | 0.183 ± 0.138     | 0.262 ± 0.191             | 0.182 ± 0.125     | 0.215                      |
| Baso   | (10 <sup>3</sup> /μL) | 0.068 ± 0.048  | 0.076 ± 0.034     | 0.075                      | 0.100 ± 0.053            | 0.070 ± 0.017     | 0.087 ± 0.032             | 0.100 ± 0.026     | 0.114 ± 0.062             | 0.098 ± 0.024     | 0.090                      |
| LUC    | (10 <sup>3</sup> /μL) | 0.072 ± 0.044  | 0.060 ± 0.027     | 0.050                      | 0.107 ± 0.040            | 0.063 ± 0.042     | 0.067 ± 0.031             | 0.097 ± 0.025     | 0.126 ± 0.057             | 0.100 ± 0.025     | 0.090                      |

End of recovery = 26 days after the final dosing.

Data are means ± S.D. \**P* < 0.05, \*\**P* < 0.01 vs. control.

RBC, red blood cells; Hb, hemoglobin; Ht, hematocrit; MCV, mean corpuscular volume; MCH, mean corpuscular hemoglobin; MCHC, mean corpuscular hemoglobin concentration; Ret, reticulocytes; Plat, platelets; WBC, white blood cells; Neutro, neutrophils; Lymph, lymphocytes; Mono, monocytes; Eosino, eosinophils; Baso, basophils; LUC, large unstained cells.

**Table S8.** Blood chemistry of juvenile cynomolgus monkeys in the 4-week repeat-dose toxicity study.

|          |         | Control        |                   |                            | Pabinafusp alfa, 3 mg/kg |                   | Pabinafusp alfa, 10 mg/kg |                   | Pabinafusp alfa, 30 mg/kg |                   |                            |       |
|----------|---------|----------------|-------------------|----------------------------|--------------------------|-------------------|---------------------------|-------------------|---------------------------|-------------------|----------------------------|-------|
|          |         | Pre<br>(n = 5) | Day 27<br>(n = 3) | End of recovery<br>(n = 2) | Pre<br>(n = 5)           | Day 27<br>(n = 3) | Pre<br>(n = 5)            | Day 27<br>(n = 3) | Pre<br>(n = 5)            | Day 27<br>(n = 3) | End of recovery<br>(n = 2) |       |
| AST      | (IU/L)  | 47.2 ± 6.4     | 48.2 ± 5.7        | 52.5                       | 39.0 ± 8.7               | 38.0 ± 7.0        | 30.0 ± 1.0*               | 32.3 ± 3.5*       | 42.2 ± 11.7               | 37.0 ± 8.3        | 33.0                       |       |
| ALT      | (IU/L)  | 33.6 ± 12.1    | 35.0 ± 10.6       | 28.0                       | 35.3 ± 15.0              | 38.0 ± 13.1       | 25.7 ± 1.2                | 26.3 ± 5.9        | 33.2 ± 7.2                | 36.0 ± 10.1       | 34.0                       |       |
| ALP      | (IU/L)  | 2316.0 ± 598.7 | 2432.0 ± 774.5    | 2749.5                     | 2857.0 ± 338.0           | 2488.7 ± 160.9    | 2613.0 ± 711.2            | 2073.7 ± 286.7    | 2709.8 ± 719.2            | 2383.8 ± 509.9    | 2295.0                     |       |
| CK       | (IU/L)  | 406.8 ± 159.0  | 443.2 ± 271.5     | 1001.5                     | 363.0 ± 253.0            | 387.7 ± 147.0     | 217.7 ± 38.6              | 297.3 ± 122.6     | 547.2 ± 615.2             | 333.6 ± 216.3     | 411.5                      |       |
| T-Bil    | (mg/dL) | 0.148 ± 0.030  | 0.158 ± 0.019     | 0.180                      | 0.133 ± 0.045            | 0.137 ± 0.031     | 0.150 ± 0.026             | 0.117 ± 0.023     | 0.168 ± 0.019             | 0.146 ± 0.036     | 0.155                      |       |
| TP       | (g/dL)  | 6.32 ± 0.37    | 6.28 ± 0.38       | 6.00                       | 6.07 ± 0.21              | 6.03 ± 0.23       | 6.37 ± 0.42               | 6.30 ± 0.26       | 6.16 ± 0.24               | 6.40 ± 0.70       | 6.10                       |       |
| Albumin  | (g/dL)  | 3.96 ± 0.21    | 3.96 ± 0.11       | 3.85                       | 3.90 ± 0.10              | 3.87 ± 0.15       | 4.03 ± 0.21               | 3.97 ± 0.06       | 3.92 ± 0.19               | 3.80 ± 0.14       | 4.00                       |       |
| Globulin | (g/dL)  | 2.36 ± 0.19    | 2.32 ± 0.28       | 2.15                       | 2.17 ± 0.15              | 2.17 ± 0.15       | 2.33 ± 0.21               | 2.33 ± 0.29       | 2.24 ± 0.18               | 2.60 ± 0.74       | 2.10                       |       |
| A/G      | (ratio) | 1.682 ± 0.094  | 1.722 ± 0.158     | 1.820                      | 1.807 ± 0.124            | 1.790 ± 0.142     | 1.733 ± 0.068             | 1.720 ± 0.243     | 1.760 ± 0.178             | 1.540 ± 0.354     | 1.925                      |       |
| TG       | (mg/dL) | 60.6 ± 51.4    | 77.6 ± 83.1       | 40.5                       | 32.3 ± 11.2              | 33.0 ± 3.6        | 53.7 ± 6.4                | 135.7 ± 128.5     | 72.8 ± 44.6               | 43.8 ± 14.8       | 32.5                       |       |
| T-cho    | (mg/dL) | 206.0 ± 92.1   | 192.8 ± 48.5      | 156.5                      | 190.3 ± 58.6             | 178.0 ± 40.7      | 215.7 ± 69.8              | 206.3 ± 44.7      | 155.6 ± 23.2              | 156.8 ± 27.5      | 161.5                      |       |
| Glucose  | (mg/dL) | 98.6 ± 17.8    | 90.2 ± 13.8       | 89.5                       | 119.7 ± 4.0              | 96.7 ± 16.4       | 108.7 ± 6.7               | 96.7 ± 17.6       | 120.0 ± 19.9              | 103.2 ± 12.8      | 82.5                       |       |
| UN       | (mg/dL) | 17.84 ± 4.75   | 19.08 ± 4.15      | 21.05                      | 17.17 ± 1.06             | 16.03 ± 2.48      | 17.37 ± 3.00              | 16.63 ± 3.37      | 20.20 ± 3.55              | 18.02 ± 2.91      | 20.15                      |       |
| Cre      | (mg/dL) | 0.460 ± 0.063  | 0.502 ± 0.090     | 0.580                      | 0.500 ± 0.121            | 0.483 ± 0.140     | 0.463 ± 0.060             | 0.480 ± 0.095     | 0.458 ± 0.067             | 0.480 ± 0.092     | 0.530                      |       |
| IP       | (mg/dL) | 7.560 ± 0.759  | 7.718 ± 0.855     | 6.725                      | 6.517 ± 0.687            | 6.333 ± 0.290     | 6.943 ± 0.607             | 6.890 ± 1.110     | 7.352 ± 0.775             | 6.996 ± 0.719     | 6.255                      |       |
| Ca       | (mg/dL) | 10.52 ± 0.26   | 10.50 ± 0.43      | 10.10                      | 10.20 ± 0.40             | 10.37 ± 0.67      | 10.30 ± 0.26              | 10.43 ± 0.21      | 10.24 ± 0.36              | 10.40 ± 0.43      | 10.05                      |       |
| Na       | (mEq/L) | 145.4 ± 1.5    | 147.2 ± 1.6       | 148.0                      | 146.3 ± 1.2              | 148.3 ± 1.5       | 145.0 ± 1.0               | 145.7 ± 1.5       | 145.8 ± 2.5               | 147.8 ± 2.2       | 149.0                      |       |
| K        | (mEq/L) | 4.98 ± 0.61    | 5.38 ± 0.41       | 4.05                       | 4.77 ± 0.32              | 4.73 ± 0.57       | 4.63 ± 0.60               | 5.37 ± 0.67       | 5.10 ± 0.48               | 5.20 ± 0.60       | 4.35                       |       |
| Cl       | (mEq/L) | 110.4 ± 2.6    | 110.8 ± 2.2       | 109.5                      | 109.3 ± 1.5              | 110.3 ± 1.2       | 108.0 ± 1.0               | 109.3 ± 1.2       | 110.4 ± 1.1               | 110.6 ± 2.4       | 109.5                      |       |
| Fe       | (µg/dL) | 119.78 ± 25.05 | 125.72 ± 14.83    | 124.45                     | 144.60 ± 12.40           | 157.63 ± 15.89    | 109.77 ± 23.26            | 118.33 ± 29.05    | 142.98 ± 38.01            | 123.64 ± 57.98    | 157.05                     |       |
| UIBC     | (µg/dL) | 219.94 ± 14.17 | 209.26 ± 17.51    | 164.35                     | 184.17 ± 40.22           | 170.87 ± 25.36    | 202.80 ± 23.42            | 189.37 ± 21.41    | 188.62 ± 43.45            | 217.56 ± 71.59    | 152.70                     |       |
| FER      | (ng/mL) | 6.74 ± 5.90    | 13.06 ± 9.38      | 11.00                      | 70.67 ± 54.40            | 54.23 ± 25.12     | 3.50 ± 3.60               | 15.47 ± 13.05     | 20.12 ± 9.59              | 37.62 ± 31.33     | 10.05                      |       |
| Hp       | (mg/dL) | 21.28 ± 21.90  | 15.18 ± 13.39     | 3.40                       | 17.47 ± 5.73             | 11.87 ± 3.32      | 19.10 ± 14.29             | 14.40 ± 6.93      | 19.22 ± 16.70             | 15.80 ± 13.46     | 3.85                       |       |
| TIBC     | (µg/dL) | 339.72 ± 30.03 | 334.98 ± 28.08    | 288.80                     | 328.77 ± 28.38           | 328.50 ± 35.02    | 312.57 ± 34.75            | 307.70 ± 50.46    | 331.60 ± 29.72            | 341.20 ± 29.75    | 309.75                     |       |
| TSAT     | (%)     | 35.02 ± 4.76   | 37.46             | 2.47                       | 43.20                    | 44.40 ± 7.31      | 48.10 ± 3.35              | 35.00 ± 5.38      | 38.10 ± 3.26              | 43.18 ± 11.27     | 36.68 ± 16.85              | 50.70 |

End of recovery = 26 days after the final dosing.

Data are means ± S.D. \**P* < 0.05 vs. control.

AST, aspartate transaminase; ALT, alanine transaminase; ALP, alkaline phosphatase; CK, creatine kinase; T-Bil, total bilirubin; TP, total protein; A/G, albumin/globulin ratio; TG, triglyceride; T-cho, total cholesterol; UN, urea nitrogen; Cre, creatinine; IP, inorganic phosphorus; UIBC, unsaturated iron binding capacity; FER, ferritin; Hp, haptoglobin; TIBC, total iron binding capacity; TSAT, transferrin saturation.



**Table S9.** Hematological parameters of cynomolgus monkeys in the 26-week repeat-dose toxicity study.

| Male                         | Control        |                    |                    |                            | Pabinafusp alfa, 3 mg/kg |                    |                    | Pabinafusp alfa, 10 mg/kg |                    |                    | Pabinafusp alfa, 30 mg/kg |                    |                    |                            |
|------------------------------|----------------|--------------------|--------------------|----------------------------|--------------------------|--------------------|--------------------|---------------------------|--------------------|--------------------|---------------------------|--------------------|--------------------|----------------------------|
|                              | Pre<br>(n = 6) | Week 13<br>(n = 6) | Week 26<br>(n = 6) | End of recovery<br>(n = 2) | Pre<br>(n = 4)           | Week 13<br>(n = 4) | Week 26<br>(n = 4) | Pre<br>(n = 4)            | Week 13<br>(n = 4) | Week 26<br>(n = 4) | Pre<br>(n = 4)            | Week 13<br>(n = 4) | Week 26<br>(n = 4) | End of recovery<br>(n = 2) |
| RBC (10 <sup>6</sup> /μL)    | 5.360 ± 0.165  | 5.118 ± 0.193      | 5.427 ± 0.239      | 5.880                      | 5.843 ± 0.330            | 5.518 ± 0.246      | 5.910 ± 0.213**    | 5.663 ± 0.418             | 5.615 ± 0.464*     | 5.670 ± 0.140      | 5.627 ± 0.309             | 5.350 ± 0.219      | 5.755 ± 0.231*     | 5.975                      |
| Hb (g/dL)                    | 13.05 ± 0.44   | 12.27 ± 0.47       | 13.13 ± 0.44       | 14.10                      | 14.10 ± 0.78             | 13.05 ± 0.57       | 14.03 ± 0.43*      | 13.65 ± 0.78              | 12.98 ± 1.05       | 13.30 ± 0.44       | 13.55 ± 0.79              | 12.20 ± 0.74       | 13.08 ± 0.61       | 13.90                      |
| Ht (%)                       | 41.68 ± 1.73   | 39.77 ± 1.78       | 42.57 ± 1.20       | 47.05                      | 45.70 ± 3.01*            | 43.25 ± 2.12       | 46.30 ± 3.23*      | 45.23 ± 1.88              | 43.48 ± 2.61*      | 44.48 ± 1.17       | 44.03 ± 2.07              | 41.12 ± 2.23       | 43.92 ± 1.91       | 46.00                      |
| MCV (fL)                     | 77.80 ± 2.21   | 77.70 ± 1.97       | 78.53 ± 2.12       | 80.05                      | 78.28 ± 4.25             | 78.38 ± 2.29       | 78.33 ± 3.81       | 80.03 ± 3.06              | 77.58 ± 2.44       | 78.48 ± 2.47       | 78.28 ± 2.22              | 76.87 ± 1.90       | 76.35 ± 3.06       | 76.95                      |
| MCH (pg)                     | 24.38 ± 0.61   | 23.97 ± 0.77       | 24.27 ± 0.78       | 24.05                      | 24.13 ± 0.21             | 23.65 ± 0.13       | 23.73 ± 0.22       | 24.15 ± 1.13              | 23.10 ± 0.73       | 23.48 ± 0.93       | 24.12 ± 0.49              | 22.82 ± 0.71*      | 22.78 ± 0.89*      | 23.30                      |
| MCHC (g/dL)                  | 31.35 ± 1.02   | 30.87 ± 0.69       | 30.88 ± 0.58       | 30.05                      | 30.88 ± 1.48             | 30.18 ± 0.95       | 30.30 ± 1.66       | 30.15 ± 0.70              | 29.78 ± 0.75       | 29.90 ± 0.43       | 30.82 ± 0.66              | 29.70 ± 0.41*      | 29.85 ± 0.47*      | 30.25                      |
| Ret (%)                      | 1.03 ± 0.31    | 2.02 ± 0.47        | 1.08 ± 0.33        | 1.00                       | 1.05 ± 0.25              | 2.05 ± 0.54        | 0.98 ± 0.33        | 1.23 ± 0.62               | 2.58 ± 1.83        | 1.10 ± 0.35        | 0.95 ± 0.25               | 2.32 ± 0.31        | 1.07 ± 0.36        | 0.55                       |
| Plat (10 <sup>3</sup> /μL)   | 442.0 ± 61.0   | 402.7 ± 83.5       | 360.5 ± 45.1       | 366.5                      | 434.3 ± 135.9            | 417.3 ± 121.8      | 382.3 ± 104.2      | 380.5 ± 68.4              | 363.8 ± 70.8       | 324.3 ± 42.1       | 427.8 ± 92.7              | 438.7 ± 75.0       | 393.0 ± 64.4       | 343.5                      |
| WBC (10 <sup>3</sup> /μL)    | 9.910 ± 1.423  | 10.288 ± 2.143     | 10.540 ± 2.573     | 10.060                     | 11.015 ± 3.604           | 21.575 ± 20.038    | 12.348 ± 4.437     | 11.648 ± 3.221            | 12.053 ± 4.034     | 11.975 ± 2.896     | 10.125 ± 1.820            | 14.207 ± 2.533     | 12.752 ± 2.269     | 11.715                     |
| Neutro (10 <sup>3</sup> /μL) | 4.348 ± 1.277  | 3.042 ± 0.819      | 2.637 ± 0.965      | 2.810                      | 4.690 ± 1.917            | 4.553 ± 1.352      | 4.250 ± 2.768      | 3.903 ± 0.715             | 3.215 ± 0.930      | 2.578 ± 0.550      | 4.730 ± 1.023             | 4.492 ± 0.947      | 3.785 ± 1.337      | 4.505                      |
| Lymph (10 <sup>3</sup> /μL)  | 5.053 ± 1.331  | 6.702 ± 1.756      | 7.282 ± 2.011      | 6.720                      | 5.860 ± 3.925            | 14.995 ± 16.648    | 7.455 ± 2.381      | 7.170 ± 2.513             | 8.210 ± 3.526      | 8.603 ± 2.412      | 5.030 ± 1.709             | 9.002 ± 2.572      | 8.373 ± 2.150      | 6.545                      |
| Mono (10 <sup>3</sup> /μL)   | 0.272 ± 0.064  | 0.340 ± 0.122      | 0.397 ± 0.084      | 0.315                      | 0.278 ± 0.105            | 0.658 ± 0.612      | 0.378 ± 0.122      | 0.258 ± 0.082             | 0.295 ± 0.083      | 0.390 ± 0.149      | 0.248 ± 0.097             | 0.415 ± 0.153      | 0.348 ± 0.101      | 0.485                      |
| Eosino (10 <sup>3</sup> /μL) | 0.162 ± 0.229  | 0.125 ± 0.055      | 0.130 ± 0.069      | 0.125                      | 0.090 ± 0.115            | 0.750 ± 1.394      | 0.160 ± 0.160      | 0.160 ± 0.134             | 0.225 ± 0.197      | 0.295 ± 0.252      | 0.043 ± 0.012             | 0.157 ± 0.090      | 0.127 ± 0.085      | 0.085                      |
| Baso (10 <sup>3</sup> /μL)   | 0.037 ± 0.012  | 0.030 ± 0.015      | 0.043 ± 0.018      | 0.040                      | 0.038 ± 0.022            | 0.258 ± 0.416      | 0.058 ± 0.032      | 0.058 ± 0.025             | 0.048 ± 0.032      | 0.048 ± 0.021      | 0.032 ± 0.012             | 0.058 ± 0.025      | 0.057 ± 0.022      | 0.045                      |
| LUC (10 <sup>3</sup> /μL)    | 0.040 ± 0.018  | 0.050 ± 0.023      | 0.052 ± 0.020      | 0.050                      | 0.055 ± 0.017            | 0.368 ± 0.602      | 0.050 ± 0.012      | 0.100 ± 0.108             | 0.068 ± 0.052      | 0.063 ± 0.033      | 0.038 ± 0.012             | 0.087 ± 0.050      | 0.060 ± 0.018      | 0.050                      |

  

| Female                       | Control        |                    |                    |                            | Pabinafusp alfa, 3 mg/kg |                    |                    | Pabinafusp alfa, 10 mg/kg |                    |                    | Pabinafusp alfa, 30 mg/kg |                    |                    |                            |
|------------------------------|----------------|--------------------|--------------------|----------------------------|--------------------------|--------------------|--------------------|---------------------------|--------------------|--------------------|---------------------------|--------------------|--------------------|----------------------------|
|                              | Pre<br>(n = 6) | Week 13<br>(n = 6) | Week 26<br>(n = 6) | End of recovery<br>(n = 2) | Pre<br>(n = 4)           | Week 13<br>(n = 4) | Week 26<br>(n = 4) | Pre<br>(n = 4)            | Week 13<br>(n = 4) | Week 26<br>(n = 4) | Pre<br>(n = 4)            | Week 13<br>(n = 4) | Week 26<br>(n = 4) | End of recovery<br>(n = 2) |
| RBC (10 <sup>6</sup> /μL)    | 5.522 ± 0.135  | 5.213 ± 0.174      | 5.523 ± 0.276      | 5.440                      | 5.625 ± 0.303            | 5.380 ± 0.467      | 5.583 ± 0.355      | 5.343 ± 0.072             | 5.005 ± 0.172      | 5.283 ± 0.245      | 5.353 ± 0.386             | 4.988 ± 0.316      | 5.423 ± 0.278      | 6.020                      |
| Hb (g/dL)                    | 13.43 ± 0.54   | 12.35 ± 0.52       | 13.02 ± 0.59       | 12.95                      | 12.98 ± 0.63             | 12.38 ± 0.92       | 12.68 ± 0.97       | 13.00 ± 0.37              | 11.73 ± 0.22       | 12.60 ± 0.26       | 12.90 ± 0.79              | 11.27 ± 0.31**     | 12.35 ± 0.27       | 13.40                      |
| Ht (%)                       | 42.57 ± 1.40   | 40.83 ± 1.59       | 42.72 ± 2.03       | 43.60                      | 41.93 ± 1.71             | 40.95 ± 2.39       | 42.18 ± 2.85       | 41.73 ± 2.10              | 38.68 ± 1.71       | 41.38 ± 0.81       | 41.35 ± 2.15              | 38.03 ± 0.98*      | 40.90 ± 1.40       | 44.95                      |
| MCV (fL)                     | 77.05 ± 1.48   | 78.35 ± 2.01       | 77.35 ± 1.38       | 80.10                      | 74.60 ± 1.96             | 76.30 ± 3.43       | 75.50 ± 2.18       | 78.10 ± 4.41              | 77.38 ± 3.69       | 78.45 ± 3.42       | 77.40 ± 3.01              | 76.38 ± 3.00       | 75.55 ± 3.13       | 74.65                      |
| MCH (pg)                     | 24.28 ± 0.71   | 23.68 ± 0.69       | 23.57 ± 0.84       | 23.85                      | 23.08 ± 0.62             | 23.03 ± 1.11       | 22.70 ± 1.06       | 24.30 ± 0.84              | 23.45 ± 0.75       | 23.88 ± 0.98       | 24.12 ± 1.19              | 22.67 ± 1.20       | 22.80 ± 1.14       | 22.20                      |
| MCHC (g/dL)                  | 31.52 ± 0.52   | 30.23 ± 0.33       | 30.48 ± 0.66       | 29.75                      | 30.93 ± 0.57             | 30.18 ± 0.54       | 30.08 ± 0.56       | 31.15 ± 0.93              | 30.33 ± 0.92       | 30.40 ± 0.56       | 31.17 ± 0.78              | 29.65 ± 0.69       | 30.18 ± 0.67       | 29.80                      |
| Ret (%)                      | 1.00 ± 0.38    | 1.85 ± 0.55        | 0.95 ± 0.38        | 1.05                       | 0.98 ± 0.17              | 1.43 ± 0.43        | 1.03 ± 0.56        | 1.10 ± 0.18               | 1.88 ± 0.57        | 1.25 ± 0.57        | 1.02 ± 0.08               | 2.38 ± 0.50        | 0.82 ± 0.24        | 0.70                       |
| Plat (10 <sup>3</sup> /μL)   | 476.7 ± 92.2   | 412.2 ± 88.4       | 395.7 ± 58.4       | 398.0                      | 469.0 ± 42.2             | 416.5 ± 58.1       | 391.8 ± 39.9       | 539.8 ± 79.6              | 473.5 ± 84.2       | 448.8 ± 65.1       | 519.5 ± 81.1              | 516.2 ± 97.2       | 451.3 ± 65.2       | 483.5                      |
| WBC (10 <sup>3</sup> /μL)    | 9.415 ± 1.874  | 9.913 ± 1.670      | 9.730 ± 2.694      | 9.150                      | 8.188 ± 2.671            | 9.255 ± 3.713      | 11.008 ± 4.604     | 10.583 ± 3.004            | 14.873 ± 5.803     | 13.503 ± 3.842     | 8.647 ± 2.257             | 13.713 ± 8.366     | 10.598 ± 3.808     | 10.215                     |
| Neutro (10 <sup>3</sup> /μL) | 4.643 ± 2.235  | 4.667 ± 1.494      | 4.780 ± 2.552      | 3.075                      | 4.433 ± 0.887            | 4.195 ± 1.588      | 4.318 ± 3.859      | 5.403 ± 2.181             | 7.268 ± 2.906      | 5.640 ± 1.117      | 3.567 ± 1.701             | 7.047 ± 8.405      | 4.282 ± 2.333      | 2.630                      |
| Lymph (10 <sup>3</sup> /μL)  | 4.293 ± 0.871  | 4.780 ± 1.108      | 4.413 ± 0.787      | 5.505                      | 3.405 ± 1.728            | 4.645 ± 3.060      | 6.078 ± 4.761      | 4.738 ± 2.124             | 6.863 ± 2.574      | 7.243 ± 2.549      | 4.685 ± 2.091             | 6.075 ± 2.257      | 5.840 ± 2.219      | 6.940                      |
| Mono (10 <sup>3</sup> /μL)   | 0.302 ± 0.079  | 0.305 ± 0.071      | 0.340 ± 0.092      | 0.350                      | 0.195 ± 0.051            | 0.230 ± 0.065      | 0.318 ± 0.115      | 0.240 ± 0.056             | 0.373 ± 0.205      | 0.358 ± 0.136      | 0.230 ± 0.107             | 0.333 ± 0.279      | 0.257 ± 0.147      | 0.350                      |
| Eosino (10 <sup>3</sup> /μL) | 0.103 ± 0.089  | 0.095 ± 0.054      | 0.135 ± 0.045      | 0.155                      | 0.078 ± 0.084            | 0.110 ± 0.132      | 0.190 ± 0.189      | 0.108 ± 0.077             | 0.235 ± 0.173      | 0.163 ± 0.081      | 0.083 ± 0.067             | 0.147 ± 0.140      | 0.147 ± 0.080      | 0.180                      |
| Baso (10 <sup>3</sup> /μL)   | 0.032 ± 0.012  | 0.025 ± 0.008      | 0.028 ± 0.015      | 0.030                      | 0.038 ± 0.022            | 0.028 ± 0.021      | 0.038 ± 0.032      | 0.038 ± 0.022             | 0.055 ± 0.039      | 0.050 ± 0.018      | 0.032 ± 0.020             | 0.047 ± 0.031      | 0.033 ± 0.008      | 0.055                      |
| LUC (10 <sup>3</sup> /μL)    | 0.042 ± 0.010  | 0.040 ± 0.018      | 0.033 ± 0.015      | 0.035                      | 0.043 ± 0.046            | 0.050 ± 0.045      | 0.068 ± 0.059      | 0.050 ± 0.022             | 0.078 ± 0.030      | 0.053 ± 0.017      | 0.045 ± 0.021             | 0.067 ± 0.036      | 0.045 ± 0.027      | 0.055                      |

End of recovery = 8 weeks after the final dosing.

Data are means ± S.D. \**P* < 0.05, \*\**P* < 0.01 vs. control.

RBC, red blood cells; Hb, hemoglobin; Ht, hematocrit; MCV, mean corpuscular volume; MCH, mean corpuscular hemoglobin; MCHC, mean corpuscular hemoglobin concentration; Ret, reticulocytes; Plat, platelets; WBC, white blood cells; Neutro, neutrophils; Lymph, lymphocytes; Mono, monocytes; Eosino, eosinophils; Baso, basophils; LUC, large unstained cells.

**Table S10.** Blood chemistry of cynomolgus monkeys in the 26-week repeat-dose toxicity study.

| Male            | Control        |                    |                    |                            | Pabinafusp alfa, 3 mg/kg |                    |                    | Pabinafusp alfa, 10 mg/kg |                    |                    | Pabinafusp alfa, 30 mg/kg |                    |                    |                            |
|-----------------|----------------|--------------------|--------------------|----------------------------|--------------------------|--------------------|--------------------|---------------------------|--------------------|--------------------|---------------------------|--------------------|--------------------|----------------------------|
|                 | Pre<br>(n = 6) | Week 13<br>(n = 6) | Week 26<br>(n = 6) | End of recovery<br>(n = 2) | Pre<br>(n = 4)           | Week 13<br>(n = 4) | Week 26<br>(n = 4) | Pre<br>(n = 4)            | Week 13<br>(n = 4) | Week 26<br>(n = 4) | Pre<br>(n = 4)            | Week 13<br>(n = 4) | Week 26<br>(n = 4) | End of recovery<br>(n = 2) |
| AST (IU/L)      | 35.5 ± 7.1     | 31.8 ± 3.1         | 31.3 ± 3.4         | 25.5                       | 38.5 ± 10.0              | 36.8 ± 2.2         | 35.5 ± 6.0         | 31.3 ± 4.1                | 31.3 ± 5.4         | 36.0 ± 12.2        | 34.8 ± 2.9                | 46.5 ± 23.0        | 36.5 ± 4.6         | 33.0                       |
| ALT (IU/L)      | 56.7 ± 29.8    | 47.7 ± 6.6         | 42.0 ± 4.8         | 32.5                       | 42.0 ± 5.8               | 46.5 ± 19.0        | 41.5 ± 10.0        | 42.0 ± 8.6                | 47.5 ± 12.8        | 61.8 ± 29.2        | 43.5 ± 21.6               | 107.7 ± 154.0      | 45.2 ± 15.4        | 34.0                       |
| ALP (IU/L)      | 1599.2 ± 472.9 | 1619.8 ± 657.6     | 1804.3 ± 564.9     | 1772.5                     | 1979.8 ± 293.4           | 2201.0 ± 309.7     | 2172.3 ± 473.8     | 1985.8 ± 474.2            | 1774.5 ± 324.5     | 1644.3 ± 322.9     | 1772.0 ± 316.9            | 1838.0 ± 420.8     | 1719.2 ± 422.1     | 1583.5                     |
| CK (IU/L)       | 144.7 ± 31.1   | 143.8 ± 31.6       | 140.7 ± 35.0       | 163.0                      | 243.3 ± 93.5*            | 222.0 ± 36.5       | 227.5 ± 85.3       | 140.0 ± 49.5              | 153.3 ± 34.7       | 132.5 ± 38.5       | 151.3 ± 34.7              | 463.3 ± 731.5      | 215.7 ± 168.7      | 117.0                      |
| T-Bil (mg/dL)   | 0.187 ± 0.097  | 0.187 ± 0.090      | 0.142 ± 0.048      | 0.170                      | 0.165 ± 0.072            | 0.153 ± 0.082      | 0.138 ± 0.056      | 0.135 ± 0.033             | 0.155 ± 0.019      | 0.158 ± 0.033      | 0.160 ± 0.061             | 0.133 ± 0.043      | 0.142 ± 0.055      | 0.155                      |
| TP (g/dL)       | 7.20 ± 0.15    | 6.95 ± 0.31        | 6.98 ± 0.32        | 7.10                       | 7.50 ± 0.48              | 7.28 ± 0.38        | 7.38 ± 0.62        | 7.23 ± 0.19               | 7.05 ± 0.24        | 7.03 ± 0.05        | 7.55 ± 0.36               | 7.30 ± 0.32        | 7.53 ± 0.26*       | 6.95                       |
| Albumin (g/dL)  | 4.15 ± 0.18    | 3.93 ± 0.18        | 4.03 ± 0.19        | 4.05                       | 4.38 ± 0.22              | 4.13 ± 0.22        | 4.28 ± 0.36        | 4.18 ± 0.15               | 4.00 ± 0.14        | 4.03 ± 0.17        | 4.28 ± 0.24               | 3.97 ± 0.20        | 4.15 ± 0.14        | 3.80                       |
| Globulin (g/dL) | 3.05 ± 0.22    | 3.02 ± 0.26        | 2.95 ± 0.24        | 3.05                       | 3.13 ± 0.29              | 3.15 ± 0.24        | 3.10 ± 0.27        | 3.05 ± 0.19               | 3.05 ± 0.21        | 3.00 ± 0.14        | 3.27 ± 0.15               | 3.33 ± 0.23        | 3.38 ± 0.19**      | 3.15                       |
| A/G (ratio)     | 1.367 ± 0.144  | 1.313 ± 0.131      | 1.375 ± 0.132      | 1.325                      | 1.403 ± 0.090            | 1.313 ± 0.100      | 1.378 ± 0.036      | 1.375 ± 0.121             | 1.315 ± 0.103      | 1.345 ± 0.115      | 1.308 ± 0.052             | 1.192 ± 0.095      | 1.228 ± 0.076      | 1.205                      |
| TG (mg/dL)      | 37.2 ± 8.1     | 43.5 ± 18.3        | 43.0 ± 17.4        | 52.0                       | 41.3 ± 29.7              | 42.5 ± 18.0        | 40.8 ± 18.8        | 56.5 ± 42.4               | 41.0 ± 15.8        | 36.5 ± 14.8        | 34.7 ± 9.6                | 34.2 ± 12.4        | 36.0 ± 11.7        | 39.5                       |
| T-cho (mg/dL)   | 131.8 ± 26.0   | 134.8 ± 19.4       | 122.2 ± 18.6       | 141.0                      | 120.5 ± 19.6             | 110.3 ± 22.2       | 111.0 ± 17.2       | 120.0 ± 22.7              | 116.5 ± 23.9       | 107.0 ± 22.1       | 132.2 ± 17.0              | 123.0 ± 18.7       | 118.5 ± 16.5       | 128.0                      |
| Glucose (mg/dL) | 78.3 ± 18.3    | 76.0 ± 9.2         | 71.7 ± 10.4        | 92.0                       | 84.5 ± 15.2              | 82.5 ± 8.5         | 71.5 ± 6.5         | 80.0 ± 9.1                | 78.3 ± 1.9         | 70.0 ± 6.0         | 85.7 ± 19.9               | 85.5 ± 11.5        | 85.8 ± 9.0*        | 87.0                       |
| UN (mg/dL)      | 25.10 ± 4.95   | 24.50 ± 5.82       | 24.13 ± 4.47       | 30.35                      | 23.85 ± 0.95             | 23.10 ± 1.28       | 23.78 ± 2.21       | 23.23 ± 3.73              | 22.70 ± 4.81       | 23.58 ± 2.48       | 24.22 ± 4.08              | 24.15 ± 4.28       | 24.78 ± 4.68       | 22.35                      |
| Cre (mg/dL)     | 0.678 ± 0.087  | 0.632 ± 0.074      | 0.645 ± 0.064      | 0.715                      | 0.665 ± 0.037            | 0.648 ± 0.039      | 0.713 ± 0.046      | 0.693 ± 0.010             | 0.690 ± 0.045      | 0.725 ± 0.053      | 0.683 ± 0.059             | 0.672 ± 0.057      | 0.733 ± 0.060*     | 0.695                      |
| IP (mg/dL)      | 5.162 ± 0.722  | 5.768 ± 0.744      | 5.833 ± 0.646      | 5.670                      | 5.680 ± 1.158            | 6.510 ± 0.888      | 5.993 ± 0.460      | 5.163 ± 0.909             | 5.945 ± 0.731      | 5.795 ± 0.571      | 5.930 ± 1.020             | 6.142 ± 0.865      | 5.770 ± 0.615      | 5.765                      |
| Ca (mg/dL)      | 9.97 ± 0.22    | 9.77 ± 0.37        | 9.72 ± 0.32        | 9.55                       | 10.43 ± 0.75             | 10.50 ± 0.69*      | 10.35 ± 0.84       | 10.25 ± 0.25              | 10.03 ± 0.33       | 9.95 ± 0.17        | 10.12 ± 0.40              | 9.93 ± 0.29        | 9.97 ± 0.27        | 9.75                       |
| Na (mEq/L)      | 147.8 ± 1.0    | 146.5 ± 0.8        | 147.0 ± 0.9        | 146.0                      | 150.5 ± 4.7              | 148.3 ± 1.3        | 148.3 ± 3.3        | 149.0 ± 2.3               | 146.5 ± 0.6        | 146.8 ± 2.5        | 148.0 ± 1.1               | 145.3 ± 2.1        | 146.7 ± 3.4        | 145.0                      |
| K (mEq/L)       | 4.65 ± 0.44    | 4.33 ± 0.37        | 4.53 ± 0.31        | 4.70                       | 4.70 ± 0.58              | 4.85 ± 0.81        | 4.58 ± 0.91        | 4.55 ± 0.17               | 4.78 ± 0.39        | 4.50 ± 0.48        | 4.68 ± 0.60               | 4.70 ± 0.44        | 4.55 ± 0.30        | 4.70                       |
| Cl (mEq/L)      | 108.3 ± 3.1    | 106.5 ± 3.4        | 107.2 ± 2.6        | 105.0                      | 109.0 ± 1.6              | 107.5 ± 2.4        | 107.0 ± 1.8        | 109.0 ± 2.6               | 109.5 ± 2.4        | 107.0 ± 2.2        | 106.8 ± 1.5               | 107.2 ± 1.2        | 106.8 ± 0.8        | 110.0                      |
| Fe (µg/dL)      | 155.20 ± 19.62 | 169.32 ± 40.13     | 178.35 ± 20.26     | 181.35                     | 158.15 ± 21.59           | 158.43 ± 34.52     | 189.70 ± 11.40     | 179.00 ± 21.12            | 179.95 ± 58.21     | 204.25 ± 21.05     | 151.98 ± 20.71            | 138.93 ± 42.53     | 159.28 ± 24.65     | 153.00                     |
| UIBC (µg/dL)    | 253.38 ± 47.61 | 257.78 ± 48.98     | 230.98 ± 39.49     | 225.60                     | 230.55 ± 34.50           | 234.35 ± 38.16     | 191.58 ± 22.16     | 247.65 ± 46.31            | 247.33 ± 76.49     | 208.70 ± 22.89     | 247.87 ± 61.96            | 256.48 ± 77.43     | 231.02 ± 63.17     | 194.90                     |
| FER (ng/mL)     | 9.20 ± 7.67    | 12.17 ± 6.81       | 10.95 ± 7.03       | 14.90                      | 8.53 ± 5.13              | 22.35 ± 7.54       | 13.25 ± 7.48       | 15.88 ± 19.94             | 13.28 ± 6.93       | 16.48 ± 4.16       | 10.82 ± 6.98              | 76.43 ± 76.80      | 13.45 ± 7.57       | 11.30                      |
| Hp (mg/dL)      | 33.80 ± 27.05  | 25.25 ± 18.25      | 34.43 ± 18.81      | 42.10                      | 14.00 ± 14.42            | 44.35 ± 15.90      | 22.23 ± 6.22       | 43.68 ± 34.22             | 34.68 ± 27.29      | 43.65 ± 15.80      | 32.50 ± 22.40             | 39.50 ± 26.45      | 34.00 ± 19.66      | 68.70                      |
| TIBC (µg/dL)    | 408.58 ± 47.87 | 427.10 ± 52.38     | 409.33 ± 46.05     | 406.95                     | 388.70 ± 16.61           | 392.78 ± 28.50     | 381.28 ± 32.18     | 426.65 ± 38.73            | 427.28 ± 23.44     | 412.95 ± 38.31     | 399.85 ± 48.91            | 395.42 ± 52.60     | 390.30 ± 53.89     | 347.90                     |

  

| Female          | Control        |                    |                    |                            | Pabinafusp alfa, 3 mg/kg |                    |                    | Pabinafusp alfa, 10 mg/kg |                    |                    | Pabinafusp alfa, 30 mg/kg |                    |                    |                            |
|-----------------|----------------|--------------------|--------------------|----------------------------|--------------------------|--------------------|--------------------|---------------------------|--------------------|--------------------|---------------------------|--------------------|--------------------|----------------------------|
|                 | Pre<br>(n = 6) | Week 13<br>(n = 6) | Week 26<br>(n = 6) | End of recovery<br>(n = 2) | Pre<br>(n = 4)           | Week 13<br>(n = 4) | Week 26<br>(n = 4) | Pre<br>(n = 4)            | Week 13<br>(n = 4) | Week 26<br>(n = 4) | Pre<br>(n = 4)            | Week 13<br>(n = 4) | Week 26<br>(n = 4) | End of recovery<br>(n = 2) |
| AST (IU/L)      | 30.7 ± 7.4     | 34.8 ± 10.8        | 35.2 ± 13.0        | 34.0                       | 34.3 ± 12.3              | 33.0 ± 11.9        | 31.8 ± 9.4         | 31.5 ± 5.8                | 41.5 ± 18.7        | 37.3 ± 16.2        | 40.3 ± 15.4               | 66.5 ± 48.8        | 33.5 ± 2.8         | 31.5                       |
| ALT (IU/L)      | 40.5 ± 17.6    | 43.7 ± 29.7        | 53.0 ± 32.2        | 74.0                       | 46.8 ± 16.0              | 38.8 ± 10.7        | 44.8 ± 9.6         | 48.5 ± 11.0               | 102.8 ± 99.1       | 51.5 ± 24.1        | 51.0 ± 22.8               | 99.2 ± 89.8        | 42.7 ± 8.0         | 45.0                       |
| ALP (IU/L)      | 1413.8 ± 763.4 | 1102.2 ± 577.8     | 978.0 ± 531.7      | 1546.5                     | 1085.8 ± 602.4           | 857.0 ± 370.7      | 842.8 ± 358.3      | 1078.3 ± 319.0            | 938.0 ± 118.6      | 882.3 ± 132.3      | 1332.0 ± 313.7            | 1116.3 ± 210.5     | 1060.3 ± 170.6     | 985.0                      |
| CK (IU/L)       | 169.0 ± 53.7   | 222.2 ± 217.1      | 440.7 ± 476.6      | 207.0                      | 264.3 ± 135.6            | 217.8 ± 116.3      | 349.5 ± 414.1      | 164.8 ± 55.9              | 170.5 ± 39.8       | 505.0 ± 381.1      | 171.3 ± 103.3             | 156.3 ± 56.3       | 171.5 ± 49.6       | 197.5                      |
| T-Bil (mg/dL)   | 0.202 ± 0.053  | 0.203 ± 0.086      | 0.182 ± 0.050      | 0.155                      | 0.170 ± 0.032            | 0.138 ± 0.031      | 0.123 ± 0.028      | 0.153 ± 0.022             | 0.148 ± 0.043      | 0.148 ± 0.033      | 0.150 ± 0.028             | 0.125 ± 0.052      | 0.145 ± 0.055      | 0.160                      |
| TP (g/dL)       | 7.13 ± 0.24    | 7.12 ± 0.29        | 7.12 ± 0.35        | 7.00                       | 7.03 ± 0.22              | 7.10 ± 0.12        | 6.95 ± 0.24        | 7.33 ± 0.25               | 7.18 ± 0.17        | 7.18 ± 0.24        | 7.03 ± 0.26               | 6.97 ± 0.36        | 6.88 ± 0.25        | 7.15                       |
| Albumin (g/dL)  | 4.10 ± 0.13    | 4.07 ± 0.14        | 4.10 ± 0.14        | 4.05                       | 4.00 ± 0.26              | 3.93 ± 0.17        | 3.93 ± 0.29        | 4.18 ± 0.10               | 3.98 ± 0.17        | 4.13 ± 0.17        | 4.05 ± 0.29               | 3.72 ± 0.43        | 3.85 ± 0.35        | 4.15                       |
| Globulin (g/dL) | 3.03 ± 0.23    | 3.05 ± 0.24        | 3.02 ± 0.26        | 2.95                       | 3.03 ± 0.13              | 3.18 ± 0.10        | 3.03 ± 0.05        | 3.15 ± 0.24               | 3.20 ± 0.14        | 3.05 ± 0.19        | 2.98 ± 0.16               | 3.25 ± 0.45        | 3.03 ± 0.23        | 3.00                       |
| A/G (ratio)     | 1.358 ± 0.108  | 1.338 ± 0.101      | 1.367 ± 0.095      | 1.370                      | 1.325 ± 0.116            | 1.238 ± 0.084      | 1.300 ± 0.115      | 1.330 ± 0.104             | 1.243 ± 0.091      | 1.355 ± 0.108      | 1.362 ± 0.154             | 1.168 ± 0.240      | 1.280 ± 0.198      | 1.385                      |
| TG (mg/dL)      | 37.5 ± 7.7     | 38.2 ± 17.7        | 44.3 ± 10.6        | 41.5                       | 36.5 ± 9.8               | 34.8 ± 13.8        | 35.5 ± 12.0        | 37.5 ± 12.6               | 43.5 ± 18.4        | 44.8 ± 18.5        | 52.0 ± 11.2               | 44.7 ± 17.8        | 52.8 ± 16.7        | 50.5                       |
| T-cho (mg/dL)   | 123.3 ± 19.0   | 127.8 ± 29.3       | 128.2 ± 19.7       | 123.5                      | 127.0 ± 16.0             | 133.8 ± 7.2        | 128.8 ± 12.6       | 130.8 ± 28.1              | 126.8 ± 35.3       | 128.8 ± 26.6       | 139.3 ± 11.4              | 127.3 ± 7.4        | 137.5 ± 10.6       | 149.5                      |
| Glucose (mg/dL) | 66.5 ± 14.0    | 67.2 ± 15.7        | 62.7 ± 12.5        | 74.5                       | 65.0 ± 17.3              | 86.0 ± 20.9        | 76.3 ± 15.7        | 68.5 ± 2.9                | 63.8 ± 3.7         | 72.3 ± 15.3        | 71.0 ± 5.2                | 61.8 ± 5.8         | 64.2 ± 5.0         | 93.5                       |
| UN (mg/dL)      | 20.65 ± 3.39   | 24.55 ± 5.73       | 26.13 ± 5.27       | 18.15                      | 20.78 ± 3.44             | 22.40 ± 2.34       | 25.05 ± 3.28       | 19.30 ± 2.41              | 22.43 ± 1.87       | 22.58 ± 4.91       | 22.75 ± 2.63              | 23.08 ± 3.62       | 25.18 ± 3.61       | 21.70                      |
| Cre (mg/dL)     | 0.608 ± 0.164  | 0.660 ± 0.158      | 0.658 ± 0.174      | 0.550                      | 0.548 ± 0.088            | 0.605 ± 0.117      | 0.615 ± 0.105      | 0.533 ± 0.061             | 0.563 ± 0.052      | 0.593 ± 0.098      | 0.580 ± 0.072             | 0.647 ± 0.074      | 0.637 ± 0.081      | 0.595                      |
| IP (mg/dL)      | 5.638 ± 1.317  | 4.798 ± 1.243      | 4.188 ± 1.311      | 5.135                      | 5.105 ± 0.686            | 4.718 ± 0.310      | 4.338 ± 0.833      | 5.593 ± 0.915             | 5.085 ± 0.239      | 5.240 ± 1.321      | 4.818 ± 1.407             | 4.725 ± 1.242      | 4.527 ± 0.822      | 5.695                      |
| Ca (mg/dL)      | 9.73 ± 0.36    | 9.98 ± 0.35        | 9.70 ± 0.42        | 9.70                       | 9.78 ± 0.38              | 10.03 ± 0.34       | 9.73 ± 0.46        | 10.18 ± 0.10              | 10.10 ± 0.29       | 10.03 ± 0.24       | 9.93 ± 0.40               | 9.57 ± 0.27        | 9.47 ± 0.35        | 9.75                       |
| Na (mEq/L)      | 147.3 ± 1.6    | 146.2 ± 1.2        | 147.0 ± 1.1        | 147.0                      | 147.0 ± 2.2              | 146.0 ± 0.8        | 146.5 ± 1.3        | 147.8 ± 1.9               | 145.3 ± 1.7        | 146.3 ± 2.6        | 148.3 ± 2.2               | 147.8 ± 1.7        | 146.8 ± 1.2        | 147.0                      |
| K (mEq/L)       | 4.27 ± 0.23    | 4.30 ± 0.11        | 4.10 ± 0.31        | 4.15                       | 4.43 ± 0.35              | 4.48 ± 0.15        | 4.40 ± 0.29        | 4.58 ± 0.38               | 4.55 ± 0.33        | 4.53 ± 0.39        | 4.60 ± 0.53               | 4.33 ± 0.34        | 4.47 ± 0.31        | 4.10                       |
| Cl (mEq/L)      | 110.0 ± 1.7    | 109.2 ± 1.7        | 108.8 ± 2.1        | 110.0                      | 110.8 ± 4.1              | 108.8 ± 2.5        | 108.5 ± 2.6        | 110.5 ± 2.4               | 109.8 ± 2.1        | 109.0 ± 3.6        | 109.2 ± 1.5               | 108.7 ± 2.0        | 108.0 ± 2.3        | 107.0                      |
| Fe (µg/dL)      | 147.27 ± 42.97 | 155.92 ± 40.60     | 178.50 ± 47.23     | 150.95                     | 126.20 ± 34.57           | 139.65 ± 46.95     | 156.43 ± 39.76     | 157.05 ± 25.15            | 159.85 ± 25.23     | 201.23 ± 40.16     | 158.40 ± 23.24            | 123.40 ± 38.75     | 174.70 ± 25.13     | 175.70                     |
| UIBC (µg/dL)    | 194.05 ± 38.54 | 188.28 ± 43.18     | 161.30 ± 39.90     | 210.10                     | 223.63 ± 13.45           | 213.53 ± 38.01     | 181.03 ± 47.71     | 208.23 ± 43.71            | 214.55 ± 29.59     | 162.13 ± 68.08     | 223.02 ± 57.50            | 248.40 ± 66.21     | 202.47 ± 58.44     | 246.30                     |
| FER (ng/mL)     | 3.55 ± 3.34    | 9.05 ± 6.78        | 8.20 ± 5.15        | 4.95                       | 4.65 ± 0.97              | 2.38 ± 1.73        | 6.85 ± 3.88        | 4.15 ± 3.96               | 12.88 ± 16.62      | 12.18 ± 11.85      | 7.57 ± 6.39               | 28.02 ± 21.71      | 12.23 ± 8.20       | 13.60                      |
| Hp (mg/dL)      | 37.85 ± 21.89  | 25.77 ± 16.73      | 41.87 ± 28.13      | 42.40                      | 36.15 ± 7.62             | 23.03 ± 25.73      | 28.03 ± 9.65       | 43.05 ± 17.67             | 37.30 ± 26.69      | 48.98 ± 11.39      | 25.40 ± 14.21             | 55.85 ± 60.96      | 20.27 ± 7.23       | 53.05                      |
| TIBC (µg/dL)    | 341.32 ± 19.03 | 344.20 ± 23.41     | 339.80 ± 17.79     | 361.05                     | 349.83 ± 23.03           | 353.18 ± 25.08     | 337.45 ± 9.63      | 365.28 ± 53.80            | 374.40 ± 33.35     | 363.35 ± 48.91     | 381.42 ± 49.84            | 371.80 ± 53.54     | 377.17 ± 48.91     | 422.00                     |

End of recovery = 8 weeks after the final dosing.

Data are means ± S.D. \*P < 0.05, \*\*P < 0.01 vs. control.

AST, aspartate transaminase; ALT, alanine transaminase; ALP, alkaline phosphatase; CK, creatine kinase; T-Bil, total bilirubin; TP, total protein; A/G, albumin/globulin ratio; TG, triglyceride; T-cho, total cholesterol; UN, urea nitrogen; Cre, creatinine; IP, inorganic phosphorus; UIBC, unsaturated iron binding capacity; FER, ferritin; Hp, haptoglobin; TIBC, total iron binding capacity.

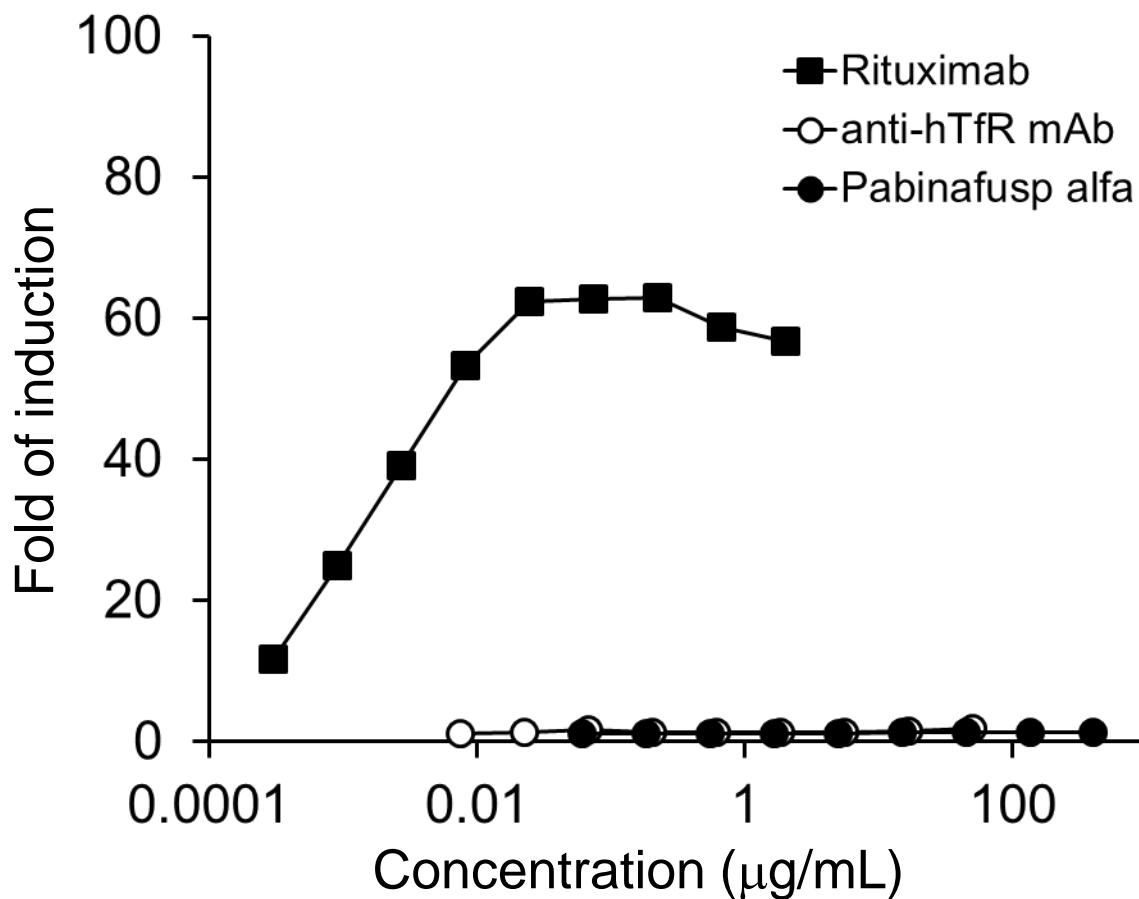

**Figure S1.** ADCC activity of rituximab as the positive control. Evaluation of effector functions of pabinafusp alfa. ADCC was assessed using the WIL2-S human B lymphoma cell line as target cells for rituximab and the CCRF-CEM human T lymphoma cell line as target cells for pabinafusp alfa. The assay was performed as described in Materials and Methods.

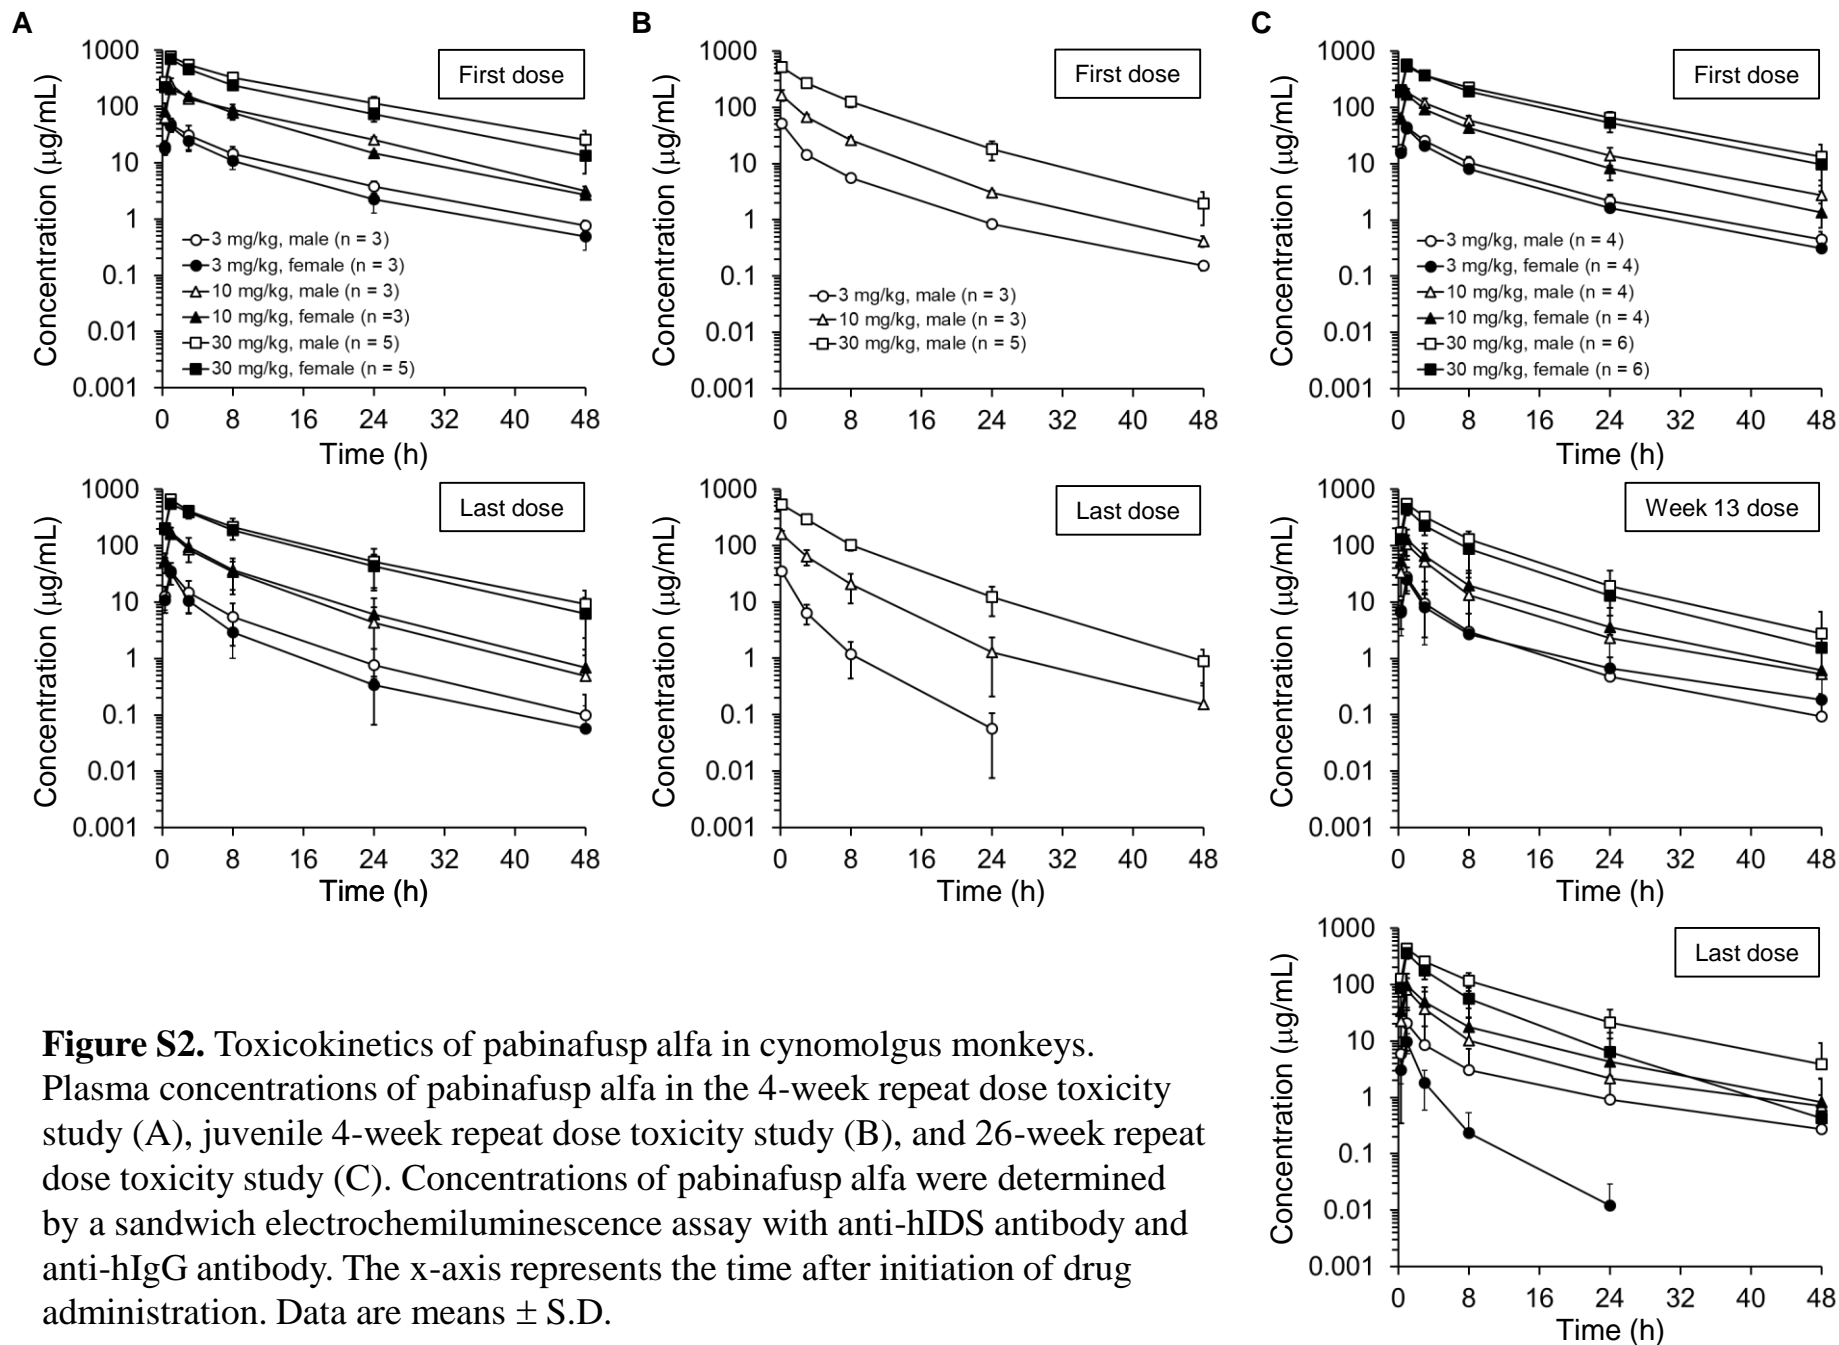

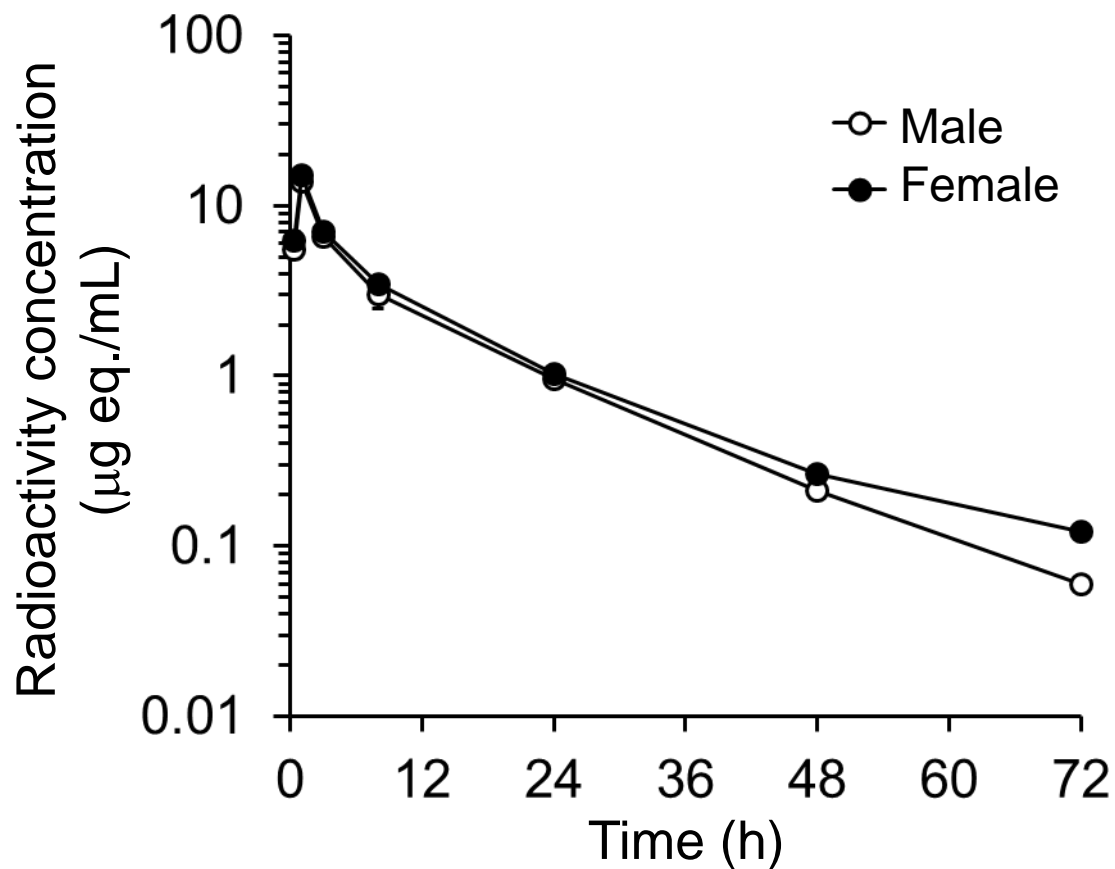

**Figure S3.** Pharmacokinetics in cynomolgus monkey after intravenous administration of  $^{125}\text{I}$ -labeled pabinafusp alfa. The x-axis represents the time after initiation of drug administration. Data are means  $\pm$  S.D. bars ( $n = 5$  for 20 min and 1 h,  $n = 4$  for 3 h and 8 h,  $n = 3$  for 24 h,  $n = 2$  for 48 h, and  $n = 1$  for 72 h).
